# Complement C5a impairs phagosomal maturation in the neutrophil through phosphoproteomic remodelling.

## Authors

Alexander J.T. Wood<sup>1</sup>, Arlette M. Vassallo<sup>1</sup>, Marie-Hélène Ruchaud-Sparagano<sup>2</sup>, Jonathan Scott<sup>2</sup>, Carmelo Zinnato<sup>1</sup>, Carmen Gonzalez-Tejedo<sup>3</sup>, Kamal Kishore<sup>3</sup>, Clive S. D'Santos<sup>3</sup>, A. John Simpson<sup>2,4</sup>, David K. Menon<sup>1</sup>, Charlotte Summers<sup>1</sup>, Edwin R. Chilvers<sup>1,5</sup>, Klaus Okkenhaug<sup>6</sup>, Andrew Conway Morris<sup>\*1,6</sup>.

## Affiliations

<sup>1</sup> Department of Medicine, University of Cambridge, Addenbrooke's Hospital, Hills Road, Cambridge, CB2 0QQ UK.

<sup>2</sup> Faculty of Medical Sciences, Newcastle University, Framlington Place, Newcastle upon Tyne, NE2 4HH, UK

<sup>3</sup> Cancer Research UK Cambridge Institute, University of Cambridge, Li Ka Shing Centre, Robinson Way, Cambridge, CB2 0RE UK.

<sup>4</sup> Newcastle upon Tyne Hospitals NHS Foundation Trust, Queen Victoria Road, Newcastle upon Tyne, NE1 4LP UK.

<sup>5</sup> National Heart and Lung Institute, Imperial College, Dovehouse Street, London, SW3 6LY, UK.

<sup>6</sup> Division of Immunology, Department of Pathology, University of Cambridge, Tennis Court Road, Cambridge, CB2 1QP, UK.

\*Address for correspondence

Dr A Conway Morris,  
Division of Anaesthesia, Department of Medicine  
Level 4, Addenbrooke's Hospital  
Hills Road  
Cambridge UK  
CB2 0QQ  
[ac926@cam.ac.uk](mailto:ac926@cam.ac.uk)

# Abstract

Critical illness is accompanied by the release of large amounts of the anaphylotoxin, C5a. C5a suppresses antimicrobial functions of neutrophils which is associated with adverse outcomes. The signalling pathways that mediate C5a-induced neutrophil dysfunction are incompletely understood. Healthy donor neutrophils exposed to purified C5a demonstrated a prolonged defect (7 hours) in phagocytosis of *Staphylococcus aureus*. Phosphoproteomic profiling of 2712 phosphoproteins identified persistent C5a signalling and selective impairment of phagosomal protein phosphorylation on exposure to *S. aureus*. Notable proteins included early endosomal marker ZFYVE16 and V-ATPase proton channel component ATPV1G1. A novel assay of phagosomal acidification demonstrated C5a-induced impairment of phagosomal acidification which was recapitulated in neutrophils from critically ill patients. Examination of the C5a-impaired protein phosphorylation indicated a role for the phosphatidylinositol 3-kinase VPS34 in phagosomal maturation. Inhibition of VPS34 impaired neutrophil phagosomal acidification and killing of *S. aureus*. This study provides a phosphoproteomic assessment of human neutrophil signalling in response to *S. aureus* and its disruption by C5a, identifying a defect in phagosomal maturation and new mechanisms of immune failure in critical illness.

Key words: Neutrophils, Complement system proteins, *Staphylococcus aureus*, Critical care, Phosphoproteome

# Introduction

Critically ill patients who require exogenous organ support as a result of severe physiologic insult, are at high risk of secondary infections (Vincent *et al*, 2009). Critical illness may arise from a variety of sterile or infectious insults. However, despite its varied aetiology, critical illness is often accompanied by stereotyped immune dysregulation, with features of both hyperinflammation and immune-mediated organ damage, as well as impairment of anti-microbial functions (Meakins *et al*, 1977; Conway Morris *et al*, 2013; Hotchkiss *et al*, 2013a). Critical illness is estimated to cause 58 million adult deaths per year globally, (Adhikari *et al*, 2010) and whilst much of the mortality is attributable to the underlying condition, secondary infections make a significant contribution to the eventual outcome (Adhikari *et al*, 2010; Scicluna *et al*, 2015; van Vught *et al*, 2016; Vincent *et al*, 2006).

Impairment of immune cell function predicts secondary infection, (Hotchkiss *et al*, 2013b; Conway Morris *et al*, 2013; Demaret *et al*, 2015; Landelle *et al*, 2010) and failure of neutrophil phagocytosis and bacterial killing has been demonstrated to be one of the strongest predictors of these infections. A key driver of the functional impairment of neutrophils is the anaphylatoxin C5a (Conway Morris *et al*, 2009, 2011; Huber-Lang *et al*, 2002b). However, there remain no efficacious treatments for critical-illness induced immune dysfunction, in part because the mechanisms that underpin C5a-induced dysfunction are incompletely understood.

A wealth of data have demonstrated the importance of C5a in driving classical inflammatory events in neutrophils, including chemotaxis (Ward & Newman, 1969; Ehrenguber *et al*, 1994), generation of reactive oxygen species (ROS) (Suire *et al*, 2006; Mazaki *et al*, 2006; Huber-Lang *et al*, 2002b), phagocytosis (Mollnes *et al*, 2002; Brekke *et al*, 2007), degranulation (Denk *et al*, 2017a, 2017b), and delayed apoptosis (Lee *et al*, 2008; Perianayagam *et al*, 2002, 2004). In critical illness, dysregulated activation of the complement and coagulation cascades occurs, leading to exposure of neutrophils to high concentrations of C5a (Hotchkiss *et al*, 2013a; Venet & Monneret, 2018; Lord *et al*, 2014; Conway-Morris *et al*, 2018; Ward, 2004). In these circumstances, we and others have shown that C5a reduces neutrophil phagocytosis and ROS production in both rodent models and critically ill patients (Conway Morris *et al*, 2009, 2011; Czermak *et al*, 1999; Huber-Lang *et al*, 2002b). Further, C5a exposure has been shown to be associated with nosocomial infection, organ failure, and increased mortality in critically ill patients (Conway Morris *et al*, 2011, 2009, 2013; Czermak *et al*, 1999; Huber-Lang *et al*, 2001, 2002a).

Whilst several signals mediating aspects of C5a-induced neutrophil dysfunction have been established (Conway Morris *et al*, 2011; Denk *et al*, 2017a; Huber-Lang *et al*, 2002b), a global picture of

signalling in neutrophils encountering common pathogens and how this process is perturbed by C5a does not exist. Such studies are challenging in neutrophils owing to their high degradative enzyme content and short *in-vitro* survival times (Luerman *et al*, 2010).

This study aimed to characterise the neutrophil phosphoprotein response to a common nosocomial pathogen, *Staphylococcus aureus*, and investigate how this is perturbed by prior exposure to C5a. Our differential phosphoprotein analysis implicated C5a in altered phagosomal maturation, findings that we confirmed with functional neutrophil assays in C5a-treated healthy donor cells and those from critically ill patients. The phosphoprotein response to *S. aureus* implicated the involvement of the phosphatidylinositol 3-kinase VPS34, hence we continued examined the effects of this enzyme on phagosomal maturation.

## Results

### C5a induces a prolonged defect in neutrophil phagocytosis of bacteria

C5a induces a defect in phagocytosis of the clinically relevant bacterial species *S. aureus* (Figure 1A) and *E. coli* (1B). Pulse exposure of neutrophils to C5a revealed a persistent defect in phagocytosis lasting at least seven hours (1C), with short pulses inducing a significant defect. These effects were not explained by the loss of cell viability (1D). A similar prolonged defect was identified in the whole blood assay (1E), representing continuous exposure of neutrophils to C5a (which cannot be washed off in this assay). The ability of C5a to inhibit phagocytosis was dependent on the temporal relationship between C5a and *S. aureus* exposure. Only pre-exposure to C5a induced the defect in phagocytosis, whereas co-exposure or the addition of C5a 30 minutes after *S. aureus* addition failed to induce a defect (1F).

To explore the potential mechanisms whereby pre-exposure to *S. aureus* prevents the inhibitory effect of C5a, we examined whether this could be due to reduced C5aR1 expression. Although we could demonstrate a reduction in C5aR1 following *S. aureus* exposure (Figure S1A), this was modest and similar to the reductions induced by other inflammatory mediators including lipopolysaccharide (LPS) and leukotriene A (LTA), neither of which ameliorated the subsequent suppressive effect of C5a (Figure S1B). Further, C5a and not LPS, LTA, granulocyte-macrophage colony-stimulating factor (GM-CSF) and tumour necrosis factor (TNF) reduced neutrophil phagocytosis (Figure S1C). To confirm the functional relevance of C5a-impaired phagocytosis, we demonstrated that C5a pre-treatment reduced bacterial killing of *S. aureus* (Figure S1D).

### *S. aureus* and C5a induce widespread changes in the neutrophil phosphoproteome

Although key signalling ‘nodes’ have been identified in neutrophils following C5a exposure (Conway Morris *et al*, 2009, 2011), no map of global signalling networks has been produced. Given the rapidity of the C5a-induced phagocytic impairment demonstrated above, and the known signalling kinetics of G-protein coupled receptors (GPCRs) (Lohse *et al*, 2008), we examined post-translational modification by phosphorylation (i.e. a phosphoproteomic approach).

In total, 4859 proteins and 2712 phosphoproteins were identified in peripheral blood neutrophils obtained from four healthy volunteers. C5a-induced suppression of phagocytosis in these donors was confirmed (Figure S2A), and technical reproducibility was high (Figures S2B-E) with the magnitude of phosphorylation changes within the previously reported range (Papachristou *et al*, 2018). Changes in the human proteome were minimal (2 % of total proteome with *S. aureus* treatment) whereas phosphoprotein expression varied markedly (31.6 % of total phosphoproteome with *S. aureus*

treatment, Table S1). Figure 2 shows the top 2.5% most variable phosphoproteins with protein identification, whereas the top 25 % are shown in Figure S3 to demonstrate wider changes within the phosphoproteome. The phosphoproteomic and proteomic datasets are publicly available in the PRIDE database (data available to reviewers, will be made public on acceptance of manuscript).

### **C5a exposure induces persistent alteration in phosphoproteins across several pathways.**

Figure 3A shows a volcano plot comparing neutrophils treated with C5a versus vehicle control. 119 proteins were significantly differentially phosphorylated at 1 hour, indicating persistent signalling, consistent with the prolonged inhibition of phagocytosis seen in Figure 1. Notably, C5aR1 remained highly phosphorylated (a modification key to its internalisation) (Braun *et al*, 2003) and this change has been used to identify C5a-exposed, dysfunctional neutrophils (Conway Morris *et al*, 2009, 2011, 2013, 2018; Schmidt *et al*, 2015; Unnewehr *et al*, 2013). Pathway enrichment using Metascape (Zhou *et al*, 2019) indicated involvement of pathways including membrane trafficking, regulated exocytosis (degranulation), and phosphatidylinositol-3,4,5-trisphosphate (PIP3) signalling which persist one hour after stimulation with C5a (Figure 3B).

### ***S. aureus* induces a marked alteration in the phosphoproteome which is significantly impacted by C5a exposure**

Exposure of neutrophils to *S. aureus* induced a marked alteration in the phosphoproteome (Figure 4A); 863 proteins (31% of the phosphoproteome) significantly alter their phosphor-status. Pathway enrichment indicated the involvement of multiple pathways, notably Rho-GTPase signalling, endosomal transport, degranulation, and actin cytoskeleton organisation (Figure 4B, with extended heatmap showing top 100 pathways shown in Figure S4).

C5a exposure prior to *S. aureus* reduced the phosphoprotein response to the bacterium considerably (Figure 4C). However, comparing C5a and control treated cells exposed to *S. aureus*, 19 proteins were identified, suggesting selective pathway modulation (Figure 4D). When mapped to known pathways using Metascape (Zhou *et al*, 2019) and manually annotated from the Uniprot database (The Uniprot Consortium, 2019), a pattern of reduced phosphorylation of phagosomal maturation proteins (Tables

Table ) and pathways (Figure 4E) emerged. Notably, early endosomal marker ZFYVE16 and its interactor TOM1 had impaired phosphorylation following C5a exposure, as did V-type ATPase subunit G1 (which is critical for phagosomal acidification). ZFYVE16 requires phosphatidylinositol-3-phosphate (PI3P) for recruitment to the phagosome (Sorkin & Von Zastrow, 2009). Another prominent PI3P-responsive protein noted was Ras-related protein 7a (RAB7A), although this protein

was not differentially phosphorylated between the C5a/*S. aureus* and vehicle control/*S. aureus* conditions. Figure S5 shows individual donor data for these key proteins.

Our dataset suggests that C5a exposure that precedes pathogen encounter prevents effective signalling through the phagosomal maturation pathways, and links intracellular signalling to the prolonged functional impairment noted in this context. The other major cluster of differentially phosphorylated proteins were nuclear and nuclear membrane proteins, many of which are involved in mitosis and nuclear envelope integrity.

### **C5a induces an impairment in phagosomal acidification, distinct from the impairment in ingestion.**

The phosphoproteomic signature of altered phagosomal maturation following C5a exposure, and the involvement of V-ATPase suggested that C5a had effects beyond impaired ingestion of bacteria. To disentangle the effects of phagocytic ingestion and phagolysosomal acidification, *S. aureus* bioparticles co-labelled with the pH-insensitive dye AF488 and pHrodo™ red were used. Neutrophils ingested particles, and then subsequently acidified the phagosome, a process which could be ablated by the addition of the V-ATPase inhibitor bafilomycin (Bowman *et al*, 1988) (Figures 5A and B). C5a pre-treatment increased the proportion of neutrophils that failed to ingest particles (Figure 5C) and increased the population that ingested particles but failed to acidify the phagosome (Figure 5D). Recent reports suggest that C5a induces Na<sup>+</sup>/H<sup>+</sup> exchanger-1 (NHE-1)-mediated cytoplasmic alkalisation (Denk *et al*, 2017a). An NHE-1 inhibitor did not alter the C5a-mediated effect on phagosomal acidification (Figure 5E), suggesting that the pathways mediating these two effects of C5a on neutrophils are distinct. Furthermore, we confirmed previous work (Huber-Lang *et al*, 2002b) showing C5a impaired ROS production (Figure S6), which in combination with the current findings, suggests C5a induces a generalised failure of phagosomal maturation in addition to its effect on phagocytic ingestion.

### **VPS34 inhibition impairs phagosomal acidification**

The differential phosphoprotein analysis (Tables Table ) and phagosomal acidification assays (Figure 5) demonstrated impaired phagosomal maturation after exposure to C5a. As noted, several of the phosphoproteins that were differentially phosphorylated are known interactors with PI3P. The phosphatidylinositol 3-kinase VPS34 is the dominant source of PI3P in mammalian cells (Devereaux *et al*, 2013). Although VPS34 itself was detected, its phosphorylation status was not significantly altered. However, the finding that C5a altered the phosphorylation status of PI3P-responsive proteins led us to explore the role of VPS34 in

phagosomal acidification. We used the selective inhibitor, VPS34IN1 (Bago *et al*, 2014) to examine the role of this enzyme in phagosomal acidification, and how this related to the defect induced by C5a. VPS34IN1 did not alter the percentage of neutrophils that underwent phagocytosis (Figure 6A and time-course in E) but did lead to a reduction in the overall number of particles ingested (Figure 6B) and a more marked reduction in pHrodo signal (Figure 6C and time course in F), indicating VPS34IN1 impairs phagosomal acidification. VPS34 inhibition also led to an impairment in the killing of *S. aureus* (Figure 6D), similar to that observed with C5a (Figure S1D) without a significant reduction in phagosomal ROS production (Figure S7).

### Neutrophils from critically ill patients exhibit defective phagosomal acidification

To establish the relevance of our findings to the clinical setting, we used our assay of phagosomal acidification to interrogate neutrophils obtained from critically ill patients and healthy volunteers. We assessed neutrophil function in critically ill patients, defining neutrophil dysfunction as phagocytosis of <50% in our previously established zymosan assay (Figure 7A), a threshold associated with a markedly increased risk of nosocomial infection (Pinder *et al*, 2018; Conway Morris *et al*, 2009, 2011). Using our phagosomal acidification assay, we then compared patients with dysfunctional neutrophils to critically ill patients with functional neutrophils and healthy controls. Dysfunctional neutrophils exhibited a failure of phagosomal acidification (Figure 7B) that was not seen in patients with functional neutrophils. Furthermore, we observed a correlation between C5aR1 expression (decreased after C5a exposure) and phagocytosis (Figure 7C) and an inverse correlation between C5aR1 expression and phagosomal acidification (Figure 7D), though the latter correlation did not reach statistical significance. The patients with dysfunctional and functional neutrophils could not be readily identified by clinical factors such as severity of illness or precipitating insult (Table S2). These data provide evidence of dysfunctional phagosomal acidification in critically ill patients and imply a role for C5a in driving this dysfunction.

## Discussion

Our data demonstrate that C5a induces both a prolonged defect in phagocytosis of relevant pathogens (*S. aureus* and *E.coli*), and persistent signalling across multiple pathways for some hours after the well characterised initial signalling events such as ionised calcium flux (Blackwood *et al*, 1996) and PIP3 generation (Houslay *et al*, 2016). This finding supports the proposal that persistent C5a-induced signalling may mediate the neutrophil dysfunction observed in critically ill patients (Conway Morris *et al*, 2009, 2011).

To our knowledge, the data presented here (Figures 3-5) represent the deepest sequencing of the human neutrophil proteome and phosphoproteome (Muschter *et al*, 2015; Tak *et al*, 2017; McLeish *et al*, 2013). These data provide a phosphoproteomic assessment of the human neutrophil response to *S. aureus* and C5a. Unlike transcriptomic data (Juss *et al*, 2016; Rorvig *et al*, 2013; Kobayashi *et al*, 2002), phosphoproteomics provides a direct assessment of mediators that are likely to have functional implications, especially in short-lived cells such as neutrophils (Luerman *et al*, 2010; Fessler *et al*, 2002) and early pathogen exposure timepoints, as examined in this study.

The marked changes observed in phosphoproteins in response to *S. aureus* are perhaps unsurprising, as the response to and clearance of bacteria are primary functions of neutrophils. Many of the pathways identified (Figures 4 and S4) are consistent with established literature on neutrophil responses to *S. aureus*, and indeed other bacteria, including activation of PI3K (Li *et al*, 2016), toll-like receptor signalling (Jann *et al*, 2011) and neutrophil degranulation (McGovern *et al*, 2011).

The enrichment of PI3K and Rho GTPase signalling on C5a stimulation are in keeping with our previous identification of key roles for these molecules in C5a-mediated functional deficits in neutrophils (Conway Morris *et al*, 2009, 2011; Scott *et al*, 2015). The marked suppression of the phosphorylation response to *S. aureus* induced by C5a pre-treatment is not simply a response to reduced particle ingestion. Fifteen minutes after pathogen contact there were limited differences in the ingestion rates between C5a and control treatments, and these became more marked over time (Figure 1). Furthermore, the differential analysis of C5a/*S. aureus* versus vehicle control/*S. aureus* conditions identified defects in specific signalling pathways, most notably those involving endosomal trafficking. This led us to examine the process of phagosomal maturation, and to identification of a C5a-induced failure of phagosomal acidification (Figure 5) with similar findings in critically ill patients (Figure 7). Failure of phagosomal maturation and intracellular killing has been described in primary immune deficiency (Buvelot *et al*, 2017), but has not previously been described as part of the immuno-paresis of critical illness. Impaired phosphorylation in pathways involving nuclear envelope breakdown and nuclear pore disassembly by C5a was unanticipated. The functional relevance of these changes remains unclear, though they may be early processes in the formation of non-lethal DNA-containing neutrophil extracellular traps (NETs) (Pilschek *et al*, 2010).

Important signalling proteins involved in the process of phagosomal maturation (such as RAB7A, TOM1 and ZFYVE16) can be recruited to the phagosomal membrane by PI3P produced predominantly by VPS34 (Botelho *et al*, 2000; Levin *et al*, 2016; Sorkin & Von Zastrow, 2009). Both ZFYVE16 and TOM1 phosphorylation were impaired by C5a exposure. We investigated the role of VPS34 as a mediator of neutrophil bactericidal function, and found that selective VPS34 inhibition produced a similar impairment in phagosomal acidification to that observed with C5a (Figure 6). The

finding that a similar defect could be induced by inhibiting VPS34, the dominant source of PI3P in neutrophils (Devereaux *et al*, 2013), adds further validation to the pathway signature identified in the phosphoproteomic profile.

Ellson and colleagues (Ellson *et al*, 2001) demonstrated that PI3P plays an important role in targeting neutrophil oxidase components to phagosomal membranes and its importance in phagosomal maturation has also been identified in *Dictyostelium discoideum* (Buckley *et al*, 2019), murine macrophages, and macrophage-like cell lines (Naufer *et al*, 2018). However, the role of VPS34 in human neutrophils has previously been inferred indirectly (Anderson *et al*, 2008), owing to prior lack of selective inhibitors and the difficulties of genetically manipulating human neutrophils. Anderson and colleagues (Anderson *et al*, 2008) demonstrated a role for VPS34 in NADPH oxidase-mediated reactive oxygen species generation in neutrophils. We found a non-significant reduction in ROS production (Figure S7) that was much less marked than the effect on phagosomal acidification. The reasons for these divergent findings are uncertain, though may include differences in ROS measurement assays, our use of a selective VPS34 inhibitor, and differences between primary human neutrophils and cell lines. The mechanism by which VPS34 inhibition impairs killing of *S. aureus* requires further investigation, as phagosomal acidification is not thought to be critical to this process (Lacoma *et al*, 2017) and it is likely that the enzyme inhibition leads to further defects in phagosomal maturation. It is intriguing to note that whilst VPS34 inhibition does not reduce the percentage of cells that undergo phagocytosis (Figure 6A), consistent with previous work (Anderson *et al*, 2008), it does reduce the number of particles ingested (Figure 6B). This suggests a hitherto undescribed relationship between phagosomal maturation and the capacity of cells to ingest particles.

Our data also demonstrate that the timing of C5a exposure (before, alongside, or after pathogen encounter) has an important effect on neutrophil function. Only pre-exposure to C5a impaired subsequent neutrophil phagocytosis (Figure 2). Reduced C5aR1 availability for ligation by C5a is unlikely to explain this observation, as C5aR1 downregulation is induced by multiple agents that do not have the same effect on phagocytosis (Figure S1). Given the marked phosphoproteomic response to *S. aureus* and its distinction from the response to C5a (Figures 3 and 4), a potential explanation is that signalling induced by *S. aureus* simply overwhelms C5a-induced phosphorylation changes unless they were established prior to *S. aureus* exposure, though this hypothesis requires further experimental validation.

This study was conducted entirely in primary human neutrophils, using C5a, an established, clinically relevant modulator of neutrophil function that has been linked to a range of adverse outcomes in critically ill patients. The use of clinically relevant pathogens, and the development of a whole-blood bacteraemia model, increases the relevance of our study to the *in-vivo* situation. Impaired ingestion of

zymosan by patient neutrophils has been associated with adverse outcomes including development of subsequent nosocomial infection (Conway Morris *et al*, 2011). The finding that patients with such impairment also manifest impaired phagosomal acidification that correlates with markers of C5a exposure (Figure 7) suggests that the identified mechanisms may be clinically relevant.

Several potential limitations should be highlighted. The phosphoproteomic response to *S. aureus* was evoked with heat-killed bacterial particles, conjugated with fluorescent dyes, and these may not fully reflect the response to live bacteria, although they do allow parallel functional assessment and standardisation of the stimulus between donors and across research sites. Although whole blood is a more physiologically relevant than cell-culture media, it remains an abstraction from the situation *in-vivo*, as it must be anticoagulated and does not involve normal flow or interaction with a vascular endothelium. Furthermore, the model may not reflect the function of neutrophils that have migrated into tissues, where most bacterial infections occur. Technical limitations currently prevent efficient phosphoproteomic assessment of cells from whole blood, and therefore isolated cells with the inherent *in-vitro* artefacts must be used.

In conclusion, we have demonstrated the role of C5a in mediating neutrophil dysfunction in the clinically relevant setting of *S. aureus* and *E. coli* bacteraemia, and demonstrated that the effects of C5a can persist for many hours. We also describe the neutrophil phosphoproteomic response to *S. aureus*, and to prolonged exposure to C5a. This approach identified a defective phagosomal maturation signature induced by C5a, likely involving modulation of Class III PI3K-dependent pathways. Further, we have shown the functional manifestation of this phosphorylation signature in a model of bacteraemia. Finally, the clinical relevance of this failure of phagosomal acidification was observed in critically ill patients. A deeper understanding of the biology of neutrophil dysfunction in critical illness is key to developing effective treatments for a phenomenon associated with multiple adverse clinical outcomes.

# Materials and methods

## Donors

Ethical permission for obtaining peripheral venous blood from healthy volunteers was provided by the Cambridge Local Research Ethics Committee (REC reference 06/Q0108/281) and all donors provided written, informed consent. Critically ill patient blood samples were obtained under an approval granted by the North East-Newcastle & North Tyneside 2 Research Ethics Committee (REC reference: 18/NE/0036). Inclusion and exclusion criteria are detailed in the supplemental methods. Assent was provided by a personal or nominated consultee.

Further details of methods and reagents described below are available in the supplementary materials.

## Neutrophil isolation

Neutrophils were isolated from citrated peripheral venous blood by using a modification of the discontinuous plasma-Percoll density gradient centrifugation technique initially described by Böyum in 1968.(Boyum, 1968)

## Phagocytosis of pHrodo™ *S. aureus* and *E. coli* Bioparticles by purified neutrophils

Purified human neutrophils, suspended in Iscoves Modified Dulbecco's Medium (IMDM) with 1 % autologous serum at a concentration of  $5 \times 10^6$ /mL, were incubated in microcentrifuge tubes with purified human C5a or vehicle control. pHrodo-conjugated *S. aureus* or *E. coli* bioparticles were opsonised, in 50 % autologous serum for 30 min prior to being added to the suspended cells. Analysis was by flow cytometry (Attune NxT, Thermofisher)

## No-wash, no-lyse whole blood assay of neutrophil phagocytosis and ROS production

Blood, collected into argatroban 150 µg/mL, was treated with inhibitors or priming agents as indicated in the respective figure legends, before being exposed to *S. aureus* pHrodo™/dihydrorhodamine (DHR) or *E.coli* pHrodo™. Aliquots were stained on ice with anti-CD16 antibody, diluted and analysed by flow cytometry (Attune NxT).

In variations on this assay, *S. aureus* particles labelled with the pH-insensitive dye AlexaFluor (AF)488 or dual labelled with AF488 and pHrodo red were used. pHrodo red conjugation of AF488 *S. aureus* was performed in-house using the pHrodo particle labelling kit (Thermofisher). Fluorescence of extracellular particles was quenched with trypan blue (0.1mg/mL).

Patient samples were analysed in a different laboratory that did not have access to an Attune Nxt flow cytometer, to fit with established workflows in this laboratory red cells were lysed using Pharmlyse (BD Bioscience, Wokingham, UK) followed by washing twice using a Facswash Assistant (BD Bioscience) prior to undertaking flow cytometry (Fortessa, BD Bioscience).

### **Bacterial killing assay – whole blood**

Methicillin-sensitive *S. aureus* (MSSA) bacteria (strain ASASM6, kind gift from Prof Gordon Dougan, University of Cambridge) were grown to early log-phase. Blood was collected into argatroban and incubated with bacteria for 1 hour. Human cells were lysed by addition of pH 11 distilled water for 3 minutes before plating of serial dilutions on Colombia blood agar.

### **Preparation of whole human neutrophil lysates for phosphoproteomics**

Neutrophils were isolated from whole blood as detailed above, and resuspended in RPMI 1640 media containing 10 mM HEPES with 1 % autologous serum (AS) at a concentration of  $1 \times 10^7$  cells/mL.

### **Proteomic and phosphoproteomic studies**

Triplicates of  $1 \times 10^7$  neutrophils were treated with vehicle control or C5a (100 nM, 60 minutes) at 37 °C before addition of pHrodo™ *S. aureus* (15 µg/mL). Phagocytosis was allowed to occur for 15 minutes. Aliquots were withdrawn from each triplicate and pooled at the indicated timepoints. Cells were centrifuged at 400 g for 5 min at 4 °C, supernatants aspirated, and cell pellets snap frozen in liquid nitrogen. Cells were lysed by the addition of 0.5 % sodium dodecyl sulphate (SDS)/0.1 M triethylammonium bicarbonate (TEAB) buffer and sonication, before undergoing centrifugation, trypsin digestion, tandem mass tag labelling, fractionation, phosphopeptide enrichment, and liquid chromatography and tandem mass spectrometry (LC-MS/MS) analysis. The experimental schematic can be seen in Supplemental figure S8.

### **Statistical analysis of wet laboratory data**

Data are presented as individual data points with summary statistics (median and interquartile range (IQR) or mean and standard deviation (SD) according to whether data are normally distributed. Parametric or non-parametric statistical tests were applied as appropriate after data were tested for normality using the D'Agostino-Pearson test. Tests used for comparisons are indicated in figure legends. Two-tailed *P* values were computed, *P* < 0.05 was considered statistically significant. Non-significant differences have not been indicated in figures for clarity. Statistical analyses were undertaken using GraphPad Prism v8.0 (GraphPad Software; San Diego; California).

## Statistical analysis of phosphoproteomics data

Spectral .raw files from data dependent acquisition were processed with the SequestHT search engine on Thermo Scientific Proteome Discoverer™ 2.1 software. Data were searched against both human and *S. aureus* UniProt reviewed databases at a 1 % spectrum level false discovery rate (FDR) criteria using Percolator (University of Washington). MS1 mass tolerance was constrained to 20 ppm, and the fragment ion mass tolerance was set to 0.5 Da. TMT tags on lysine residues and peptide N termini (+229.163 Da) and methylthio (+45.988 Da) of cysteine residues (+45.021 Da) were set as static modifications, while oxidation of methionine residues (+15.995 Da) and deamidation (+0.984 Da) of asparagine and glutamine residues were set as variable modifications. For TMT-based reporter ion quantitation, we extracted the signal-to-noise (S:N) ratio for each TMT channel. Parsimony principle was applied for protein grouping.

Peptide and phosphopeptide intensities were normalised across conditions using median scaling and then summed to generate protein and phosphoprotein intensities. Proteins and phosphoproteins were independently identified and quantified in all samples from all four donors; species not meeting these criteria were excluded from subsequent analysis. Log base 2 fold change (Log2FC) was calculated between conditions of interest, compared across n = 4 donors and tested for statistical significance by limma-based linear models with Bonferroni's correction for multiple testing. Hierarchical clustering using Euclidean distance was undertaken on the entire dataset. Heatmaps and volcano plots were generated as shown in Results. Statistical analyses were performed in RStudio (RStudio Team, 2016) using the qPLEXanalyzer (Papachristou *et al*, 2018) package, and plots were produced using the ggplot2 (Wickham, 2016) package.

## Data sharing statement

The mass spectrometry proteomics data have been deposited to the ProteomeXchange Consortium via the PRIDE (Perez-Riverol Y *et al*, 2019) partner repository with the dataset identifier PXD017092 and will be made public on acceptance after peer-review

## Acknowledgements

We gratefully acknowledge the generous gift of live methicillin sensitive *S. aureus* from Prof Gordon Dougan, University of Cambridge. This research was supported by the Cambridge NIHR BRC Cell Phenotyping Hub and the Cambridge NIHR Biomedical Research Centre. In particular we wish to thank Esther Perez and Natalia Savinykh for their advice on flow cytometry.

The views in this manuscript represent the views of the authors alone, and not those of the National Institute for Health Research or the Department of Health and Social Care.

## Authorship contributions (CRediT):

AJTW: Conceptualisation, formal analysis, investigation, methodology, validation, visualisation, writing – original draft, review and editing.

AV: Investigation, methodology, writing - review and editing.

MHRS: Investigation, methodology, writing - review and editing.

JS: Investigation, methodology, writing - review and editing.

CZ: Investigation, writing - review and editing.

CGT: Investigation, methodology, writing - review and editing.

KK: Methodology, data curation, software, formal analysis, writing - review and editing.

CSDS: Project administration, resources, supervision, writing - review and editing.

AJS: Project administration, resources, supervision, writing - review and editing.

DKM: Project administration, resources, supervision, writing - review and editing.

CS: Methodology, validation, project administration, resources, supervision, writing - review and editing.

ERC: Conceptualisation, formal analysis, funding acquisition, methodology, project administration, resources, supervision, writing - review and editing.

KO: Project administration, resources, supervision, writing - review and editing.

ACM: Conceptualisation, formal analysis, funding acquisition, investigation, methodology, project administration, resources, supervision, validation, writing – original draft, review and editing.

## Funding and conflict of interest disclosures

AJTW was a Gates Cambridge Scholar supported by the Gates Cambridge Trust from 2015-2018.

ACM is supported by a Clinical Research Career Development Fellowship from the Wellcome Trust (WT 2055214/Z/16/Z). Grants to ACM from the Academy of Medical Sciences and European Society for Intensive Care Medicine supported this work. The NIHR Newcastle Biomedical Research Centre and by the MRC SHIELD Antimicrobial Resistance Consortium supported the acquisition of patient data included in the manuscript.

The work in ERC's laboratory is funded by the Medical Research Council, Wellcome Trust, NIHR Imperial Biomedical Research Centre and non-commercial grants from GlaxoSmithKline.

The work in CS's laboratory is funded by the Medical Research Council, the Wellcome Trust, The British Heart Foundation, the Cambridge NIHR Biomedical Research Centre, and non-commercial grants from GlaxoSmithKline, MedImmune and BristolMyersSquibb.

Competing interests: Nil

## References

- Adhikari NK, Fowler RA, Bhagwanjee S & Rubenfeld GD (2010) Critical care and the global burden of critical illness in adults. *Lancet* **376**: 1339–1346
- Anderson KE, Boyle KB, Davidson K, Chessa TAM, Kulkarni S, Jarvis GE, Sindrilaru A, Scharffetter-Kochanek K, Rausch O, Stephens LR & Hawkins PT (2008) CD18-dependent activation of the neutrophil NADPH oxidase during phagocytosis of *Escherichia coli* or *Staphylococcus aureus* is regulated by class III but not class I or II PI3Ks. *Blood* **112**: 5202–5211
- Bago R, Malik N, Munson MJ, Prescott AR, Davies P, Sommer E, Shpiro N, Ward R, Cross D, Ganley IG & Alessi DR (2014) Characterization of VPS34-IN1, a selective inhibitor of Vps34, reveals that the phosphatidylinositol 3-phosphate-binding SGK3 protein kinase is a downstream target of class III phosphoinositide 3-kinase. *Biochem. J.* **463**: 413–427
- Blackwood RA, Hartiala KT, Kwoh EE, Transue AT & Brower RC (1996) Unidirectional heterologous receptor desensitization between both the fMLP and C5a receptor and the IL-8 receptor. *J. Leukoc. Biol.* **60**: 88–93
- Botelho RJ, Teruel M, Dierckman R, Anderson R, Wells A, York JD, Meyer T & Grinstein S (2000) Localized biphasic changes in phosphatidylinositol-4,5-bisphosphate at sites of phagocytosis. *J. Cell Biol.* **151**: 1353–68
- Bowman EJ, Siebers A & Altendorf K (1988) Bafilomycins; A class of inhibitors of membrane ATPases from microorganisms, animal cells, and plant cells. *Proc. Natl. Acad. Sci.* **85**: 7972–7976
- Boyum A (1968) Isolation of mononuclear cells and granulocytes from human blood. Isolation of mononuclear cells by one centrifugation, and of granulocytes by combining centrifugation and sedimentation at 1 g. *Scand. J. Clin. Lab. Invest. Suppl.* **97**: 77–89
- Braun L, Christophe T & Boulay F (2003) Phosphorylation of key serine residues is required for internalization of the complement 5a (C5a) anaphylatoxin receptor via a  $\beta$ -arrestin, dynamin, and clathrin-dependent pathway. *J. Biol. Chem.* **278**: 4277–4285
- Brekke O-L, Christiansen D, Fure H, Fung M & Mollnes TE (2007) The role of complement C3 opsonization, C5a receptor, and CD14 in *E. coli*-induced up-regulation of granulocyte and monocyte CD11b/CD18 (CR3), phagocytosis, and oxidative burst in human whole blood. *J. Leukoc. Biol.* **81**: 1404–1413
- Buckley CM, Heath VL, Guého A, Bosmani C, Knobloch P, Sikakana P, Personnic N, Dove SK, Michell RH, Meier R, Hilbi H, Soldati T, Insall RH & King JS (2019) PIKfyve/Fab1 is required for efficient V-ATPase and hydrolase delivery to phagosomes, phagosomal killing, and restriction of *Legionella* infection. *PLoS Pathog.* **15**: 1–26
- Buvelot H, Posfay-Barbe KM, Linder P, Schrenzel J & Krause KH (2017) *Staphylococcus aureus*, phagocyte NADPH oxidase and chronic granulomatous disease. *FEMS Microbiol. Rev.* **41**: 139–157
- Conway-Morris A, Wilson J & Shankar-Hari M (2018) Immune Activation in Sepsis. *Crit. Care Clin.* **34**: 29–42
- Conway Morris A, Anderson N, Brittan M, Wilkinson TS, McAuley DF, Antonelli J, McCulloch C, Barr LC, Dhaliwal K, Jones RO, Haslett C, Hay AW, Swann DG, Laurenson IF, Davidson DJ, Rossi AG, Walsh TS & Simpson AJ (2013) Combined dysfunctions of immune cells predict nosocomial infection in critically ill patients. *Br. J. Anaesth.* **111**: 778–787
- Conway Morris A, Brittan M, Wilkinson TS, McAuley DF, Antonelli J, McCulloch C, Barr LC, McDonald N a., Dhaliwal K, Jones RO, Mackellar A, Haslett C, Hay AW, Swann DG, Anderson N, Laurenson IF, Davidson DJ, Rossi AG, Walsh TS & Simpson AJ (2011) C5a-mediated neutrophil dysfunction is RhoA-dependent and predicts infection in critically ill patients. *Blood* **117**: 5178–5188
- Conway Morris A, Datta D, Hari MS, Stephen J, Weir CJ, Rennie J, Antonelli J, Bateman A, Warner N, Judge K, Keenan J, Wang A, Burpee T, Brown KA, Lewis SM, Mare T, Roy AI, Hulme G, Dimmick I, Rossi AG, et al (2018) Cell-surface signatures of immune dysfunction risk-stratify critically ill patients: INFECT study. *Intensive Care Med.* **44**: 627–635

- Conway Morris A, Kefala K, Wilkinson TS, Dhaliwal K, Farrell L, Walsh T, Mackenzie SJ, Reid H, Davidson DJ, Haslett C, Rossi AG, Sallénave JM & Simpson AJ (2009) C5a mediates peripheral blood neutrophil dysfunction in critically ill patients. *Am. J. Respir. Crit. Care Med.* **180**: 19–28
- Czermak BJ, Sarma V, Pierson CL, Warner RL, Huber-Lang M, Bless NM, Schmal H, Friedl HP & Ward PA (1999) Protective effects of C5a blockade in sepsis. *Nat. Med.* **5**: 788–92
- Demaret J, Venet F, Friggeri A, Cazalis M -a., Plassais J, Jallades L, Malcus C, Poitevin-Later F, Textoris J, Lepape A & Monneret G (2015) Marked alterations of neutrophil functions during sepsis-induced immunosuppression. *J. Leukoc. Biol.* **98**: 1–10 Available at:
- Denk S, Neher MD, Messerer DAC, Wiegner R, Nilsson B, Rittirsch D, Nilsson-Ekdahl K, Weckbach S, Ignatius A, Kalbitz M, Gebhard F, Weiss ME, Vogt J, Radermacher P, Köhl J, Lambris JD & Huber-Lang MS (2017a) Complement C5a Functions as a Master Switch for the pH Balance in Neutrophils Exerting Fundamental Immunometabolic Effects. *J. Immunol.* **198**: 4846–54
- Denk S, Taylor RP, Wiegner R, Cook EM, Lindorfer MA, Pfeiffer K, Paschke S, Eiseler T, Weiss M, Barth E, Lambris JD, Kalbitz M, Martin T, Barth H, Messerer DAC, Gebhard F & Huber-Lang MS (2017b) Complement C5a-Induced Changes in Neutrophil Morphology During Inflammation. *Scand. J. Immunol.* **86**: 143–155
- Devereaux K, Dall’Armi C, Alcazar-Roman A, Ogasawara Y, Zhou X, Wang F, Yamamoto A, de Camilli P & Di Paolo G (2013) Regulation of Mammalian Autophagy by Class II and III PI 3-Kinases through PI3P Synthesis. *PLoS One* **8**: 10–12
- Ehrengruber M, Geiser T & Deranleau D (1994) Activation of human neutrophils by C3a and C5A Comparison of the effects on shape changes, chemotaxis, secretion, and respiratory burst. *FEBS Lett.* **346**: 181–184
- Ellson CD, Gobert-Gosse S, Anderson KE, Davidson K, Erdjument-Bromage H, Tempst P, Thuring JW, Cooper M a, Lim ZY, Holmes a B, Gaffney PR, Coadwell J, Chilvers ER, Hawkins PT & Stephens LR (2001) PtdIns(3)P regulates the neutrophil oxidase complex by binding to the PX domain of p40(phox). *Nat. Cell Biol.* **3**: 679–682
- Fessler MB, Malcolm KC, Duncan MW & Scott Worthen G (2002) A genomic and proteomic analysis of activation of the human neutrophil by lipopolysaccharide and its mediation by p38 mitogen-activated protein kinase. *J. Biol. Chem.* **277**: 31291–31302
- Hotchkiss RS, Monneret G & Payen D (2013a) Sepsis-induced immunosuppression: from cellular dysfunctions to immunotherapy. *Nat. Rev. Immunol.* **13**: 862–74 Available at:
- Hotchkiss RS, Monneret G & Payen D (2013b) Immunosuppression in sepsis: A novel understanding of the disorder and a new therapeutic approach. *Lancet Infect. Dis.* **13**: 260–268
- Houslay DM, Anderson KE, Chessa T, Kulkarni S, Fritsch R, Downward J, Backer JM, Stephens LR & Hawkins PT (2016) Coincident signals from GPCRs and receptor tyrosine kinases are uniquely transduced by PI3K $\beta$  in myeloid cells. *Sci. Signal.* **9**: 1–13
- Huber-Lang M, Sarma VJ, Lu KT, McGuire SR, Padgaonkar VA, Guo RF, Younkin EM, Kunkel RG, Ding J, Erickson R, Curnutte JT & Ward PA (2001) Role of C5a in multiorgan failure during sepsis. *J. Immunol.* **166**: 1193–1199
- Huber-Lang MS, Riedeman NC, Sarma JV, Younkin EM, McGuire SR, Laudes IJ, Lu KT, Guo RF, Neff TA, Padgaonkar VA, Lambris JD, Spruce L, Mastellos D, Zetoune FS & Ward PA (2002a) Protection of innate immunity by C5aR antagonist in septic mice. *FASEB J.* **16**: 1567–1574
- Huber-Lang MS, Younkin EM, Sarma J V., McGuire SR, Lu KT, Guo RF, Padgaonkar VA, Curnutte JT, Erickson R & Ward PA (2002b) Complement-Induced Impairment of Innate Immunity During Sepsis. *J. Immunol.* **169**: 3223–3231
- Jann NJ, Schmalzer M, Ferracin F & Landmann R (2011) TLR2 enhances NADPH oxidase activity and killing of *Staphylococcus aureus* by PMN. *Immunol. Lett.* **135**: 17–23
- Juss JK, House D, Amour A, Begg M, Herre J, Storisceanu DML, Hoenderdos K, Bradley G, Lennon M, Summers C, Hessel EM, Condliffe A & Chilvers ER (2016) Acute respiratory distress syndrome neutrophils have a distinct phenotype and are resistant to phosphoinositide 3-kinase inhibition. *Am. J. Respir. Crit. Care Med.* **194**: 961–973
- Kobayashi SD, Voyich JM, Buhl CL, Stahl RM & DeLeo FR (2002) Global changes in gene expression by human polymorphonuclear leukocytes during receptor-mediated phagocytosis: cell fate is regulated at the level of gene expression. *Proc. Natl. Acad. Sci.* **99**: 6901–6906
- Lacoma A, Cano V, Moranta D, Regueiro V, Domínguez-Villanueva D, Laabei M, González-Nicolau

- M, Ausina V, Prat C & Bengoechea JA (2017) Investigating intracellular persistence of *Staphylococcus aureus* within a murine alveolar macrophage cell line. *Virulence* **8**: 1761–1775
- Landelle C, Lepape A, Voirin N, Tognet E, Venet F, Bohe J, Vanhems P & Monneret G (2010) Low monocyte human leukocyte antigen-DR is independently associated with nosocomial infections after septic shock. *Intensive Care Med.* **36**: 1859–1866
- Lee H, Whitfeld PL & Mackay CR (2008) Receptors for complement C5a. The importance of C5aR and the enigmatic role of C5L2. *Immunol. Cell Biol.* **86**: 153–160
- Levin R, Grinstein S & Canton J (2016) The life cycle of phagosomes: formation, maturation, and resolution. *Immunol. Rev.* **273**: 156–179
- Li L, Pian Y, Chen S, Hao H, Zheng Y, Zhu L, Xu B, Liu K, Li M, Jiang H & Jiang Y (2016) Phenol-soluble modulins  $\alpha 4$  mediate *Staphylococcus aureus*-associated vascular leakage by stimulating heparin-binding protein release from neutrophils. *Sci. Rep.* **6**: 1–12
- Lohse MJ, Hein P, Hoffmann C, Nikolaev VO, Vilardaga JP & Bunemann M (2008) Kinetics of G-protein-coupled receptor signals in intact cells. *Br. J. Pharmacol.* **153**: 125–132
- Lord JM, Midwinter MJ, Chen YF, Belli A, Brohi K, Kovacs EJ, Koenderman L, Kubek P & Lilford RJ (2014) The systemic immune response to trauma: An overview of pathophysiology and treatment. *Lancet* **384**: 1455–1465
- Luerman G, Uriarte S, Rane M & McLeish K (2010) Application of proteomics to neutrophil biology. *J. Proteomics* **73**: 552–561
- Mazaki Y, Hashimoto S, Tsujimura T, Morishige M, Hashimoto A, Aritake K, Yamada A, Nam J-M, Kiyonari H, Nakao K & Sabe H (2006) Neutrophil direction sensing and superoxide production linked by the GTPase-activating protein GIT2. *Nat. Immunol.* **7**: 724–31
- McGovern NN, Cowburn AS, Porter L, Walmsley SR, Summers C, Thompson A a R, Anwar S, Willcocks LC, Whyte MKB, Condliffe AM & Chilvers ER (2011) Hypoxia selectively inhibits respiratory burst activity and killing of *Staphylococcus aureus* in human neutrophils. *J. Immunol.* **186**: 453–463
- McLeish KR, Merchant ML, Klein JB & Ward RA (2013) Technical note: proteomic approaches to fundamental questions about neutrophil biology. *J. Leukoc. Biol.* **94**: 683–692
- Meakins JL, Pietsch JB, Bubenick O, Kelly R, Rode H, Gordon J & MacLean LD (1977) Delayed hypersensitivity: indicator of acquired failure of host defenses in sepsis and trauma. *Ann. Surg.* **186**: 241–250
- Mollnes TE, Brekke O, Fung M, Fure H, Christiansen D, Bergseth G, Videm V, Lappegård KT, Köhl J & Lambris JD (2002) Essential role of the C5a receptor in *E. coli* – induced oxidative burst and phagocytosis revealed by a novel lepirudin-based human whole blood model of inflammation. *Blood* **100**: 1869–1877
- Muschter S, Berthold T, Bhardwaj G, Hammer E, Dhople VM, Wesche J, Reil A, Bux J, Bakchoul T, Steil L, Greinacher A & Völker U (2015) Mass spectrometric phosphoproteome analysis of small-sized samples of human neutrophils. *Clin. Chim. Acta* **451**: 199–207
- Nauffer A, Hipolito VEBB, Ganesan S, Prashar A, Zaremborg V, Botelho RJ & Terebiznik MR (2018) pH of endophagosomes controls association of their membranes with Vps34 and PtdIns(3)P levels. *J. Cell Biol.* **217**: 329–346
- Papachristou EK, Kishore K, Holding AN, Harvey K, Roumeliotis TI, Chilamakuri CSR, Omarjee S, Chia KM, Swarbrick A, Lim E, Markowitz F, Eldridge M, Siersbaek R, D’Santos CS & Carroll JS (2018) A quantitative mass spectrometry-based approach to monitor the dynamics of endogenous chromatin-associated protein complexes. *Nat. Commun.* **9**: 2311
- Perianayagam MC, Balakrishnan VS, King AJ, Pereira BJG & Jaber BL (2002) C5a delays apoptosis of human neutrophils by a phosphatidylinositol 3-kinase-signaling pathway. *Kidney Int.* **61**: 456–463
- Perianayagam MC, Balakrishnan VS, Pereira BJG & Jaber BL (2004) C5a delays apoptosis of human neutrophils via an extracellular signal-regulated kinase and Bad-mediated signalling pathway. *Eur. J. Clin. Invest.* **34**: 50–56
- Perez-Riverol Y, Csordas A, Bai J, Bernal-Llinares M, Hewapathirana S, Kundu DJ, Inuganti A, Griss J, Mayer G, Eisenacher M, Pérez E, Uszkoreit J, Pfeuffer J, Sachsenberg T, Yilmaz S, Tiwary S, Cox J, Audain E, Walzer M, Jarnuczak AF, Ternent T, Brazma A,

- Vizcaino JA (2019). The PRIDE database and related tools and resources in 2019: improving support for quantification data. *Nucleic Acids Res* 47(D1):D442-D450
- Pilszczek FH, Salina D, Poon KKH, Fahey C, Yipp BG, Sibley CD, Robbins SM, Green FHY, Surette MG, Sugai M, Bowden MG, Hussain M, Zhang K & Kubes P (2010) A Novel Mechanism of Rapid Nuclear Neutrophil Extracellular Trap Formation in Response to *Staphylococcus aureus*. *J. Immunol.* **185**: 7413–7425
- Pinder EM, Rostron AJ, Hellyer TP, Ruchaud-Sparagano M-H, Scott J, Macfarlane JG, Wiscombe S, Widdrington JD, Roy AI, Linnett VC, Baudouin S V, Wright SE, Chadwick T, Fouweather T, Juss JK, Chilvers ER, Bowett SA, Parker J, McAuley DF, Conway Morris A, et al (2018) Randomised controlled trial of GM-CSF in critically ill patients with impaired neutrophil phagocytosis. *Thorax* **73**: 918–25 A
- Rorvig S, Ostergaard O, Heegaard NHH & Borregaard N (2013) Proteome profiling of human neutrophil granule subsets, secretory vesicles, and cell membrane: correlation with transcriptome profiling of neutrophil precursors. *J. Leukoc. Biol.* **94**: 711–721
- RStudio Team (2016) RStudio: Integrated Development for R Boston, MA: RStudio, Inc. Available at: <http://www.rstudio.com/>
- Schmidt T, Brodesser A, Schnitzler N, Gruger T, Brandenburg K, Zinserling J & Zundorf J (2015) CD66b overexpression and loss of C5a receptors as surface markers for *Staphylococcus aureus*-induced neutrophil dysfunction. *PLoS One* **10**: 1–18
- Scicluna BP, Klein Klouwenberg PMC, Van Vught LA, Wiewel MA, Ong DSY, Zwinderman AH, Franitza M, Toliat MR, Nurnberg P, Hoogendijk AJ, Horn J, Cremer OL, Schultz MJ, Bonten MJ, Van Der Poll T, Nürnberg P, Hoogendijk AJ, Horn J, Cremer OL, Schultz MJ, et al (2015) A molecular biomarker to diagnose community-acquired pneumonia on intensive care unit admission. *Am. J. Respir. Crit. Care Med.* **192**: 826–835
- Scott J, Harris GJ, Pinder EM, Macfarlane JG, Hellyer TP, Rostron AJ, Conway Morris A, Thickett DR, Perkins GD, McAuley DF, Widdrington JD, Wiscombe S, Baudouin S V., Roy AI, Linnett VC, Wright SE, Ruchaud-Sparagano M-H & Simpson AJ (2015) Exchange protein directly activated by cyclic AMP (EPAC) activation reverses neutrophil dysfunction induced by  $\beta$ 2-agonists, corticosteroids, and critical illness. *J. Allergy Clin. Immunol.* **137**: 535–44
- Sorkin A & Von Zastrow M (2009) Endocytosis and signalling: Intertwining molecular networks. *Nat. Rev. Mol. Cell Biol.* **10**: 609–622
- Suire S, Condcliffe AM, Ferguson GJ, Ellson CD, Guillou H, Davidson K, Welch H, Coadwell J, Turner M, Chilvers ER, Hawkins PT & Stephens L (2006) Gbetagammagmas and the Ras binding domain of p110gamma are both important regulators of PI(3)Kgamma signalling in neutrophils. *Nat. Cell Biol.* **8**: 1303–9
- Tak T, Rygiel TP, Karnam G, Bastian OW, Boon L, Viveen M, Coenjaerts FE, Meyaard L, Koenderman L & Pillay J (2017) Neutrophil mediated suppression of influenza-induced pathology requires CD11b/CD18 (MAC-1). *Am. J. Respir. Cell Mol. Biol.* **58**: 492–499
- The Uniprot Consortium (2019) UniProt: A worldwide hub of protein knowledge. *Nucleic Acids Res.* **47**: D506–D515
- Unnewehr H, Rittirsch D, Sarma JV, Flierl MA, Perl M, Denk S, Weiss M, Schneider ME, Monk PN, Neff T, Mihlan M, Barth H, Ward PA & Huber-Lang M (2013) Changes and Regulation of the C5a Receptor on Neutrophils during Septic Shock in Humans. *J. Immunol.* **190**: 1–11
- Venet F & Monneret G (2018) Advances in the understanding and treatment of sepsis-induced immunosuppression. *Nat. Rev. Nephrol.* **14**: 121–137
- Vincent J-L, Rello J, Marshall J, Eliiezer S, Anzueto A, Martin CD, Moreno R, Lipman J, Gomersall C, Sakr Y & Reinhart K (2009) International Study of the Prevalence and Outcomes of Infection in Intensive Care Units (EPIC II). *JAMA* **302**: 2323–2329
- Vincent J-L, Sakr Y, Sprung CL, Ranieri VM, Reinhart K, Gerlach H, Moreno R, Carlet J, Le Gall J-R & Payen D (2006) Sepsis in European intensive care units: results of the SOAP study. *Crit. Care Med.* **34**: 344–353
- van Vught LA, Klein Klouwenberg PMC, Spitoni C, Scicluna BP, Wiewel MA, Horn J, Schultz MJ, Nürnberg P, Bonten MJM, Cremer OL & van der Poll T (2016) Incidence, Risk Factors, and Attributable Mortality of Secondary Infections in the Intensive Care Unit After Admission for Sepsis. *JAMA* **315**: 1469–79

- Ward PA (2004) The dark side of C5a in sepsis. *Nat. Rev. Immunol.* **4**: 133–142
- Ward PA & Newman LJ (1969) A Neutrophil Chemotactic Factor from Human C5. *J. Immunol.* **102**: 93–99
- Wickham M (2016) ggplot2: Elegant Graphics for Data Analysis. New York, USA: Springer-Verlag
- Zhou Y, Zhou B, Pache L, Chang M, Khodabakhshi AH, Tanaseichuk O, Benner C & Chanda SK (2019) Metascape provides a biologist-oriented resource for the analysis of systems-level datasets. *Nat. Commun.* **10**: 1523

# Figure legends

## Figure 1: C5a induces a prolonged defect in neutrophil phagocytosis of bacteria

**A and B:** Isolated neutrophils were pre-treated with 100 nM C5a or vehicle control for 60 min before incubation with *S. aureus* (A) or *E. coli* (B) bioparticles. Data are presented as the median phagocytic index for each condition for n=7 (A) or 6 (B) independent donors, \* $P = 0.016$  (A) and 0.031 (B) by Wilcoxon's matched-pairs signed rank test.

**C:** Neutrophils were pulsed with 100 nM C5a or PBS control for the indicated periods of time, followed by 2 washes. *S. aureus* bioparticles were then added and cells were incubated for the indicated time points. Data are presented as the mean and SD of the phagocytic index of C5a-treated cells relative to their paired vehicle control for n=5 independent experiments.  $P < 0.0001$  for time and  $P = 0.0186$  for treatment by two-way ANOVA. \*\*\* $P = 0.0001$  \*\*\*\* $P < 0.0001$  by Dunnett's multiple comparison test.

**D:** Data are presented as the mean and SD of the percentage of DRAQ7 positive, dead cells for n=5 independent experiments.  $P = 0.378$  for time and  $P = 0.349$  for treatment by two-way ANOVA.

**E:** Anticoagulated whole blood was pre-treated with 300 nM C5a or control for the indicated duration before phagocytosis was measured as previously indicated. Data are presented as the mean and SD of the cumulative phagocytic index for 4 independent experiments.  $P < 0.0001$  by two-way ANOVA, \*\*\*\* $P < 0.0001$ , \*\*\* $P < 0.001$  by Sidak's multiple comparisons test.

**F:** *S. aureus* particles were incubated with isolated PMNs in the presence of 100 nM C5a or PBS added at the indicated time points, with time 0 representing the time of addition of *S. aureus* bioparticles. Experiments proceeded for the indicated time points and phagocytic index quantified. Data are presented as the mean and SD of the phagocytic index of C5a-treated cells relative to their paired vehicle control for n=5 independent experiments.  $P < 0.0001$  for time and  $P = 0.0186$  for treatment by two-way ANOVA. \*\*\*\* $P < 0.0001$  by Dunnett's multiple comparisons test.

## Figure 2: *S. aureus* and C5a induce widespread changes in the neutrophil phosphoproteome

Heatmap of phosphoprotein intensity relative to baseline ( $\log_2$  fold change) across the four experimental conditions shows phosphoproteins with variance across conditions in the top 97.5<sup>th</sup> centile with dendrograms clustered by Euclidean distance. Increased phosphoprotein expression is indicated in red, decreased in blue. Only phosphoproteins detected in all four donor samples were included.

## Figure 3: C5a exposure induces persistent alteration in phosphoproteins across several pathways

**A:** Proteins with adjusted  $P$ -values  $< 0.05$  are shown in blue and the 20 proteins with the highest absolute  $\log_2$  fold change are labelled.  $P$ -values were computed by limma-based linear models with Bonferroni's correction for multiple testing. **B:** Metascape(Zhou *et al*, 2019) enrichment heatmap showing functional clusters of phosphoproteins affected by C5a treatment.

## Figure 4: *S. aureus* induces a marked alteration in the phosphoproteome that is significantly impacted by C5a exposure

**A, B, D:** Proteins with adjusted  $P$ -values  $< 0.05$  are shown in blue and the 20 proteins with the highest absolute  $\log_2$  fold change are labelled.  $P$ -values were computed by limma-based linear models with Bonferroni's correction for multiple testing. **C:** Metascape(Zhou *et al*, 2019) enrichment heatmap showing functional clusters of phosphoproteins affected by *S. aureus* exposure. **E:**

Metascape(Zhou *et al*, 2019) bar graph showing top non-redundant functional clusters of phosphoproteins enriched in the vehicle control/*S. aureus* condition versus C5a/*S. aureus* condition.

**Figure 5:** C5a induces an impairment in phagosomal acidification, distinct from the impairment in ingestion

**A:** Exemplar flow cytometry plots of whole blood pre-treated with vehicle control or bafilomycin A (60 min; 100nM) prior to exposure to 5 µg/mL co-labelled AF488/pHrodo red *S. aureus* for 120 min. Both phagocytosis (x-axis) and phagosomal pH (y-axis) can be measured simultaneously in the same population of cells. pHrodo™ fluorescence increases with decreasing pH, indicating phagosomal maturity as shown.

**B:** Conditions as in A. Data are shown as individual data points with mean for n=7 individual donors.  $P = 0.016$  by Wilcoxon's test.

**C:** Whole blood was pre-treated with vehicle control or C5a (300 nM; 60 minutes) prior to exposure to phagocytosis probe for 180 min. Phagocytosis without maturation (i.e. AF488 signal) is shown. Data are shown as mean and SD of n = 5 individual donors. \*\*\*\* $P < 0.0001$  by repeated-measures two-way ANOVA with Bonferroni's multiple comparisons test.

**D:** Conditions as in C. The percentage of *S. aureus* particle positive (AF488+) cells with low pH (mature) and high pH (immature) phagosomes is shown for control and C5a-treated conditions. Data are shown as mean and SD of n = 5 individual donors. \*\*\* $P < 0.001$  by repeated-measures two-way ANOVA with Bonferroni's multiple comparisons test.

**E:** Whole blood was pre-treated with C5a, NHE-1 inhibitor (5µM), or both, then exposed to maturation probe for 60 min. The percentage of AF488+ cells with high pH (immature) phagolysosomes is shown. Data are shown as individual data points with median from n = 7 individual donors.  $P = 0.0080$  by Friedman's test, \* $P < 0.05$  for Dunn's test of multiple comparisons, ns = non-significant.

**Figure 6:** VPS34 inhibition impairs phagosomal acidification

Whole blood was pre-treated with vehicle control or VPS34IN1 (1 µM; 60 min) prior to addition of 5 µg/mL maturation probe (A-D), or live *S. aureus* (E), for 120 minutes prior to analysis.

**A:** Percentage of neutrophils that have phagocytosed bioparticles.  $P = 0.31$  by Wilcoxon's test. n = 6 individual donors.

**B:** MFI of ingested particles, indicating relative quantity of phagocytosis.  $P = 0.03$ . by Wilcoxon's test. n=6 individual donors.

**C:** pHrodo™ Median Fluorescent Intensity (MFI), indicating phagosomal acidification.  $P = 0.03$ . by Wilcoxon's test. n=6 individual donors.

**D:** After phagocytosis of live bacteria, human cells were lysed in alkaline dH<sub>2</sub>O and surviving bacteria were incubated overnight on blood agar. Bacterial survival was quantified by counting colonies.  $P = 0.03$  by paired t-test, n=5 individual donors.

**E-F:** Whole blood was processed as above with quantification of phagocytosis (E) and acidification (F) at the indicated time points. There was a reduction in phagosomal acidification as shown but no change in percentage of cells that underwent phagocytosis. Data are shown as mean and SD of n=5 individual donors. \*\* $P = 0.0058$  for drug treatment by repeated measures two-way ANOVA with Bonferroni's multiple comparisons test.

**Figure 7: Neutrophils from critically ill patients exhibit defective phagosomal acidification**

**A:** Zymosan-based assay demonstrating differentially impaired phagocytosis in critically ill patients. Data are shown as individual patients/controls with median values indicated.  $n = 6$  patients with dysfunctional neutrophils and 5 patients with functional neutrophils respectively.  $** P=0.004$  by Mann-Whitney U-test.

**B:** Neutrophil phagosomal acidification was assessed in whole blood from critically ill patients using the maturation probe. Patients were classed as dysfunctional using the assay from A. Data are shown as individual patients/controls with mean from  $n = 6$  patients with dysfunctional neutrophils, 5 patients with functional neutrophils and 10 healthy controls respectively.  $P = 0.04$  by one-way ANOVA.  $**P < 0.01$  by Holm-Sidak's test of multiple comparisons.

**C, D:** C5aR1 expression was assessed by flow cytometry and correlated (Spearman) with phagocytosis (C) and phagosomal acidification (D) for  $n = 12$  patients. NB: One patient's cells did not adhere to tissue culture plastic for the zymosan assay, thus they could not be assigned to dysfunctional or non-dysfunctional groups shown in A and B. C5aR1 expression and maturation probe data was available to allow inclusion in correlation analyses in C and D, hence the difference in numbers between these figures.

# Figures

Figure 1

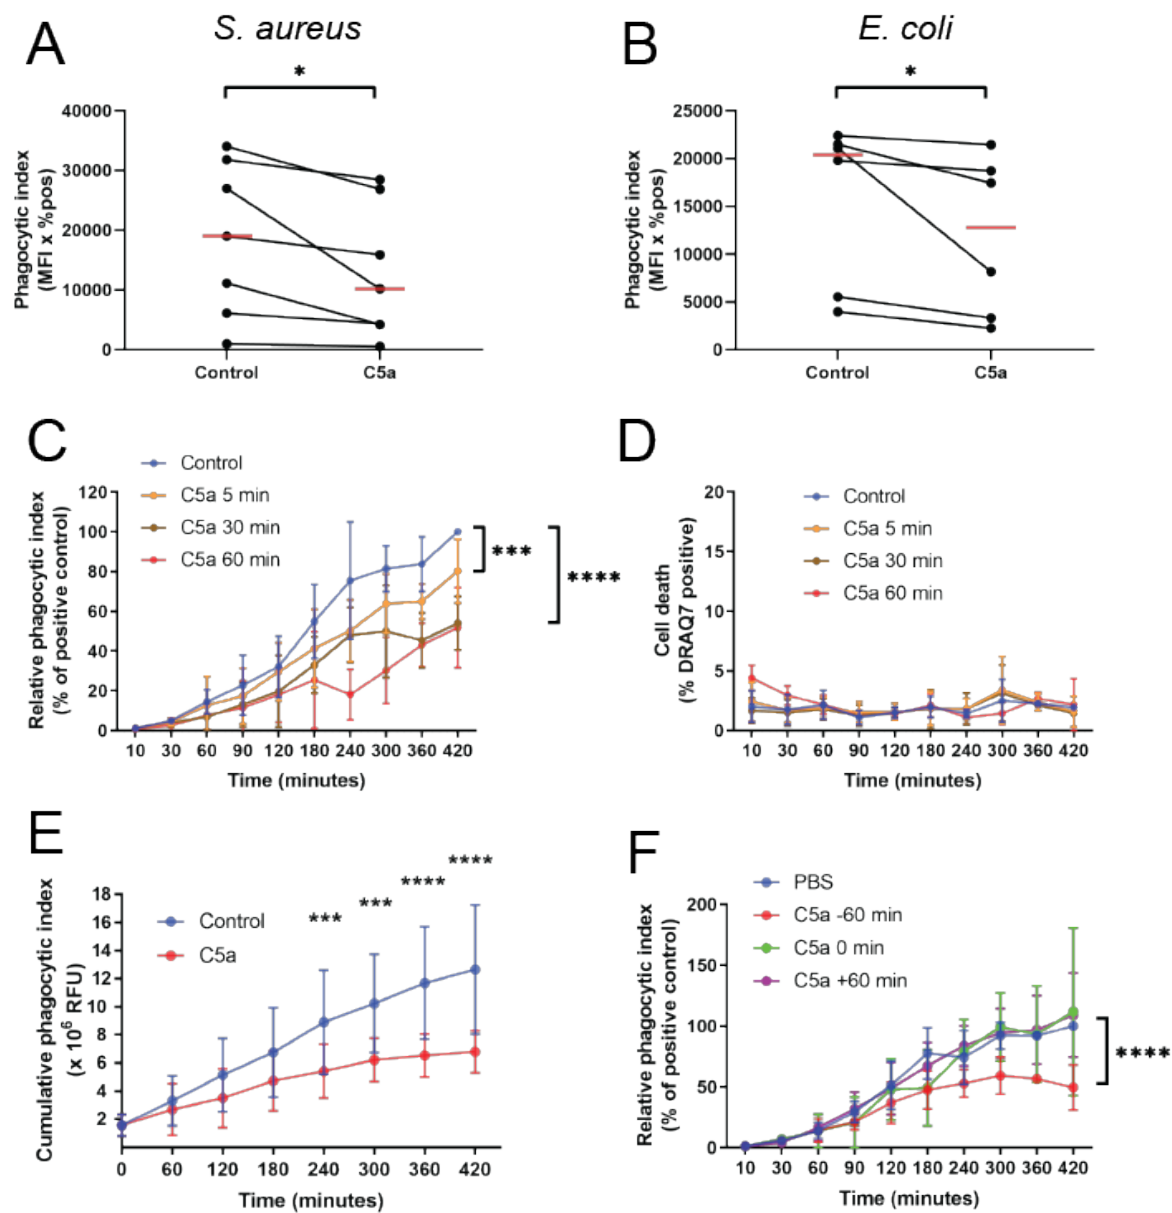

Figure 2

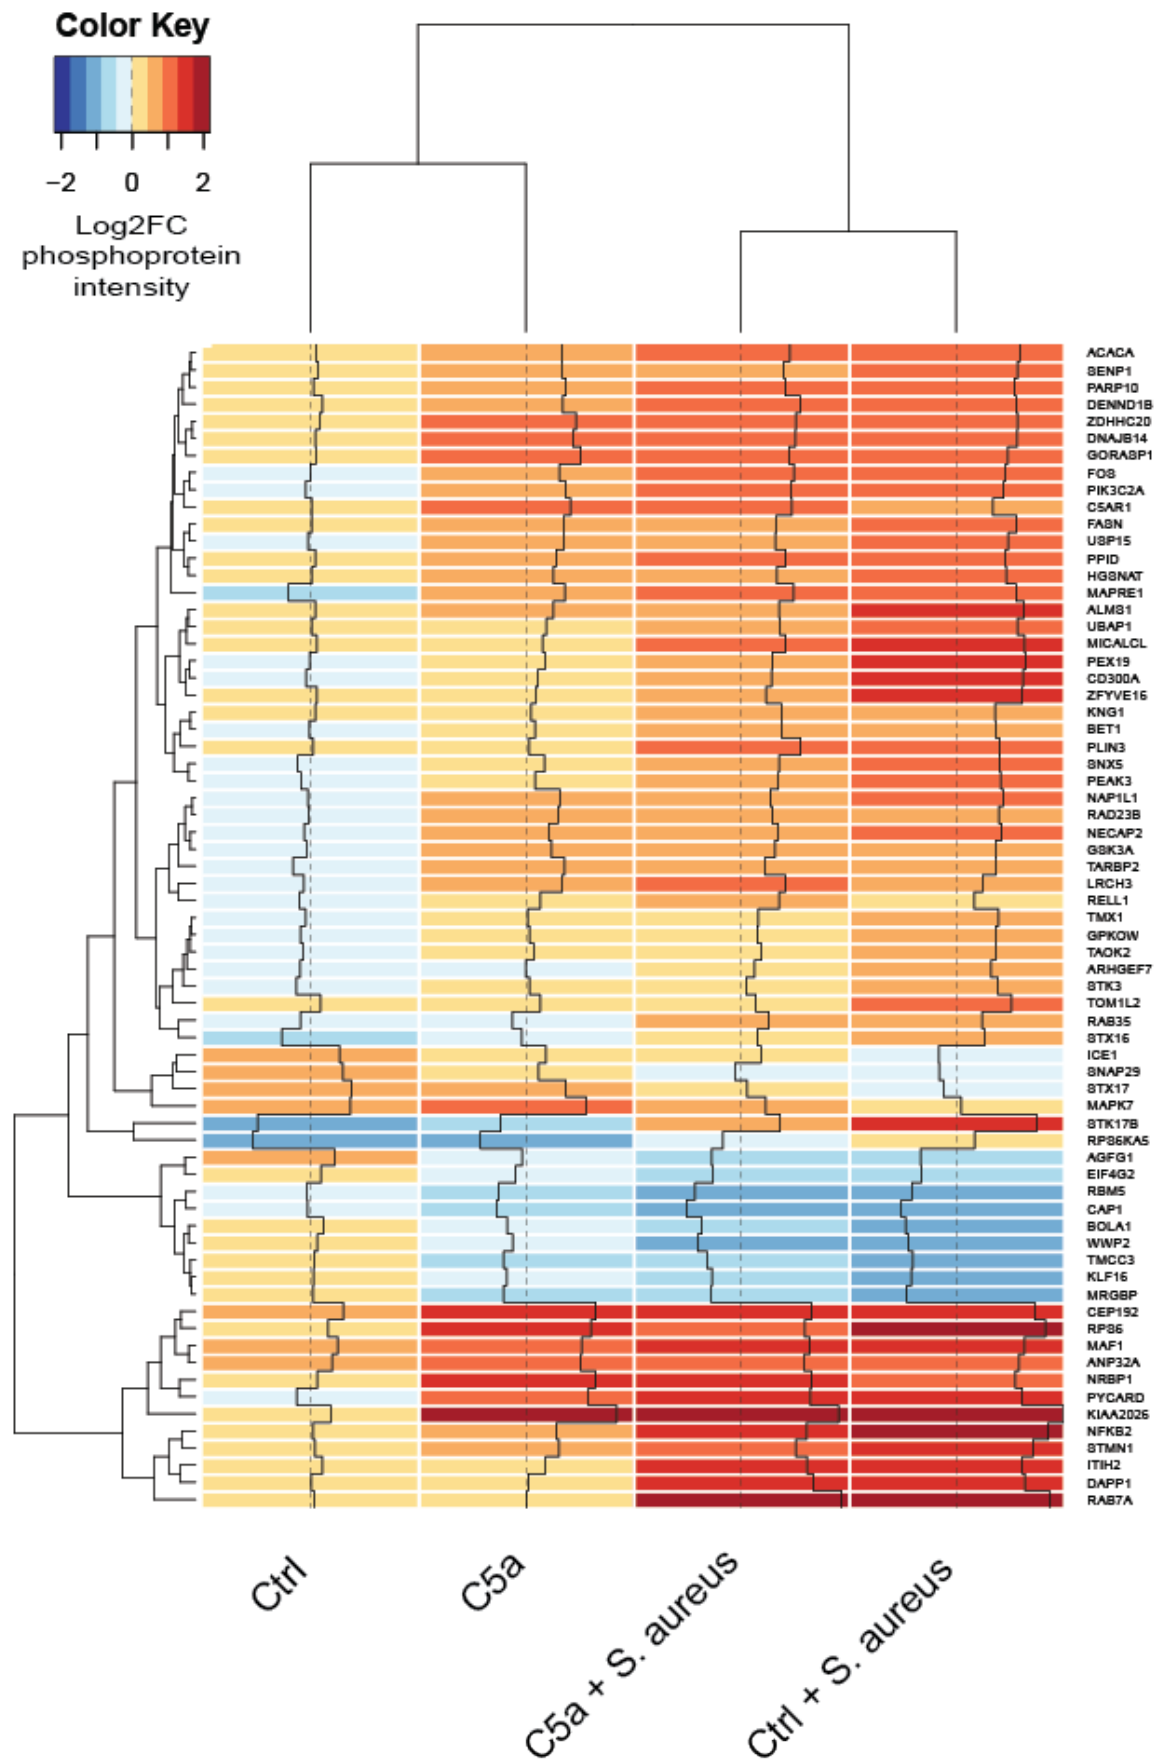

**Figure 3**

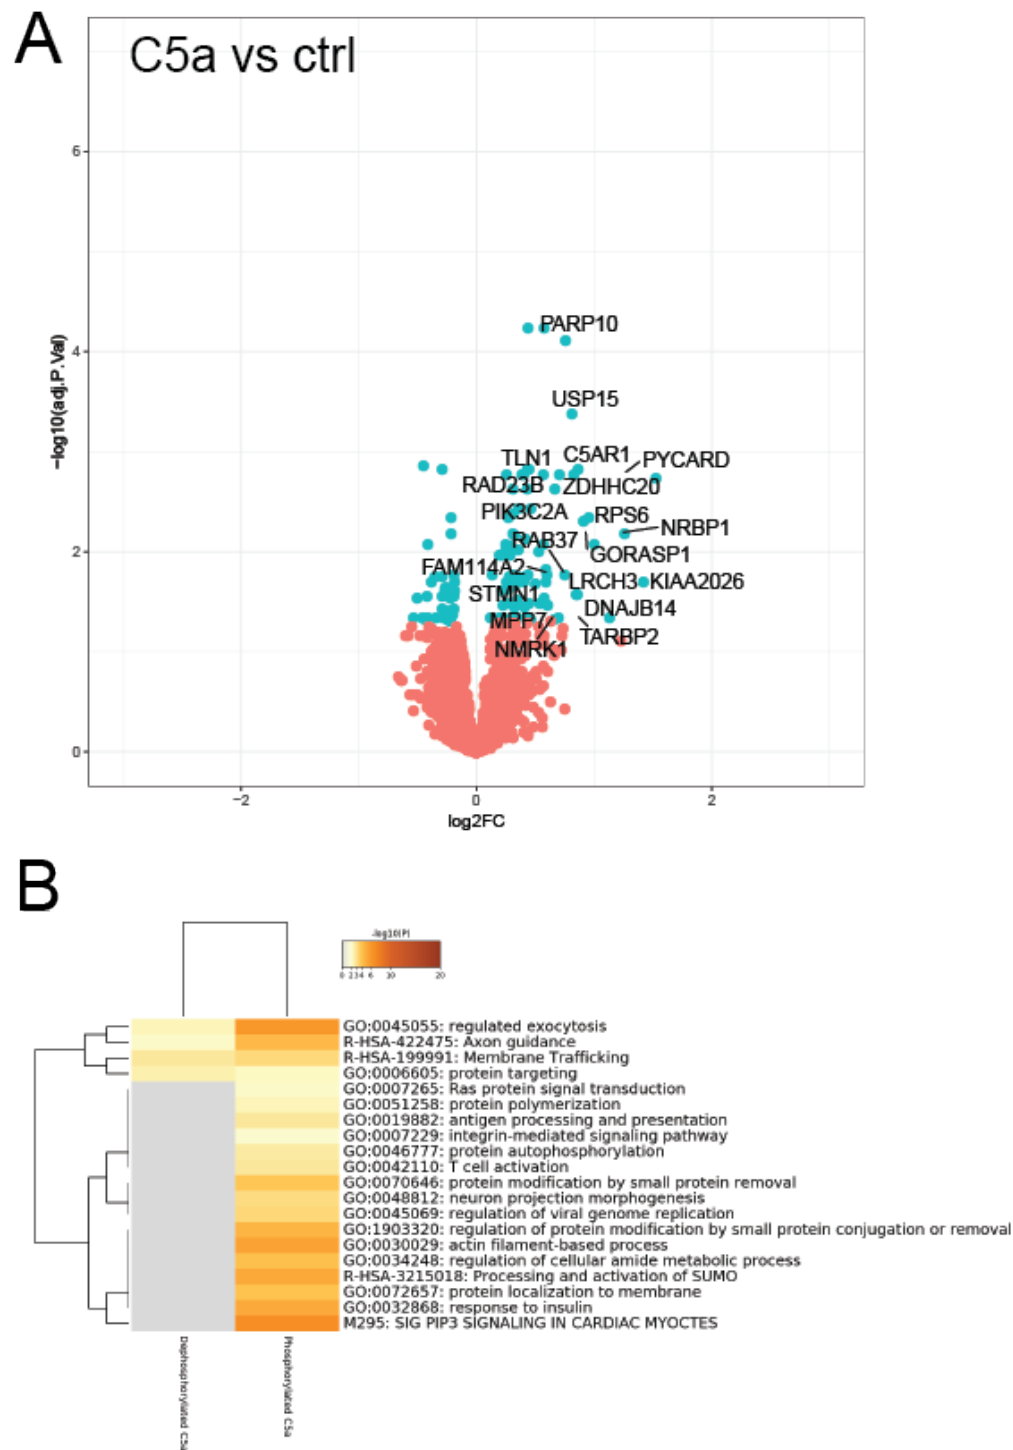

**Figure 4**

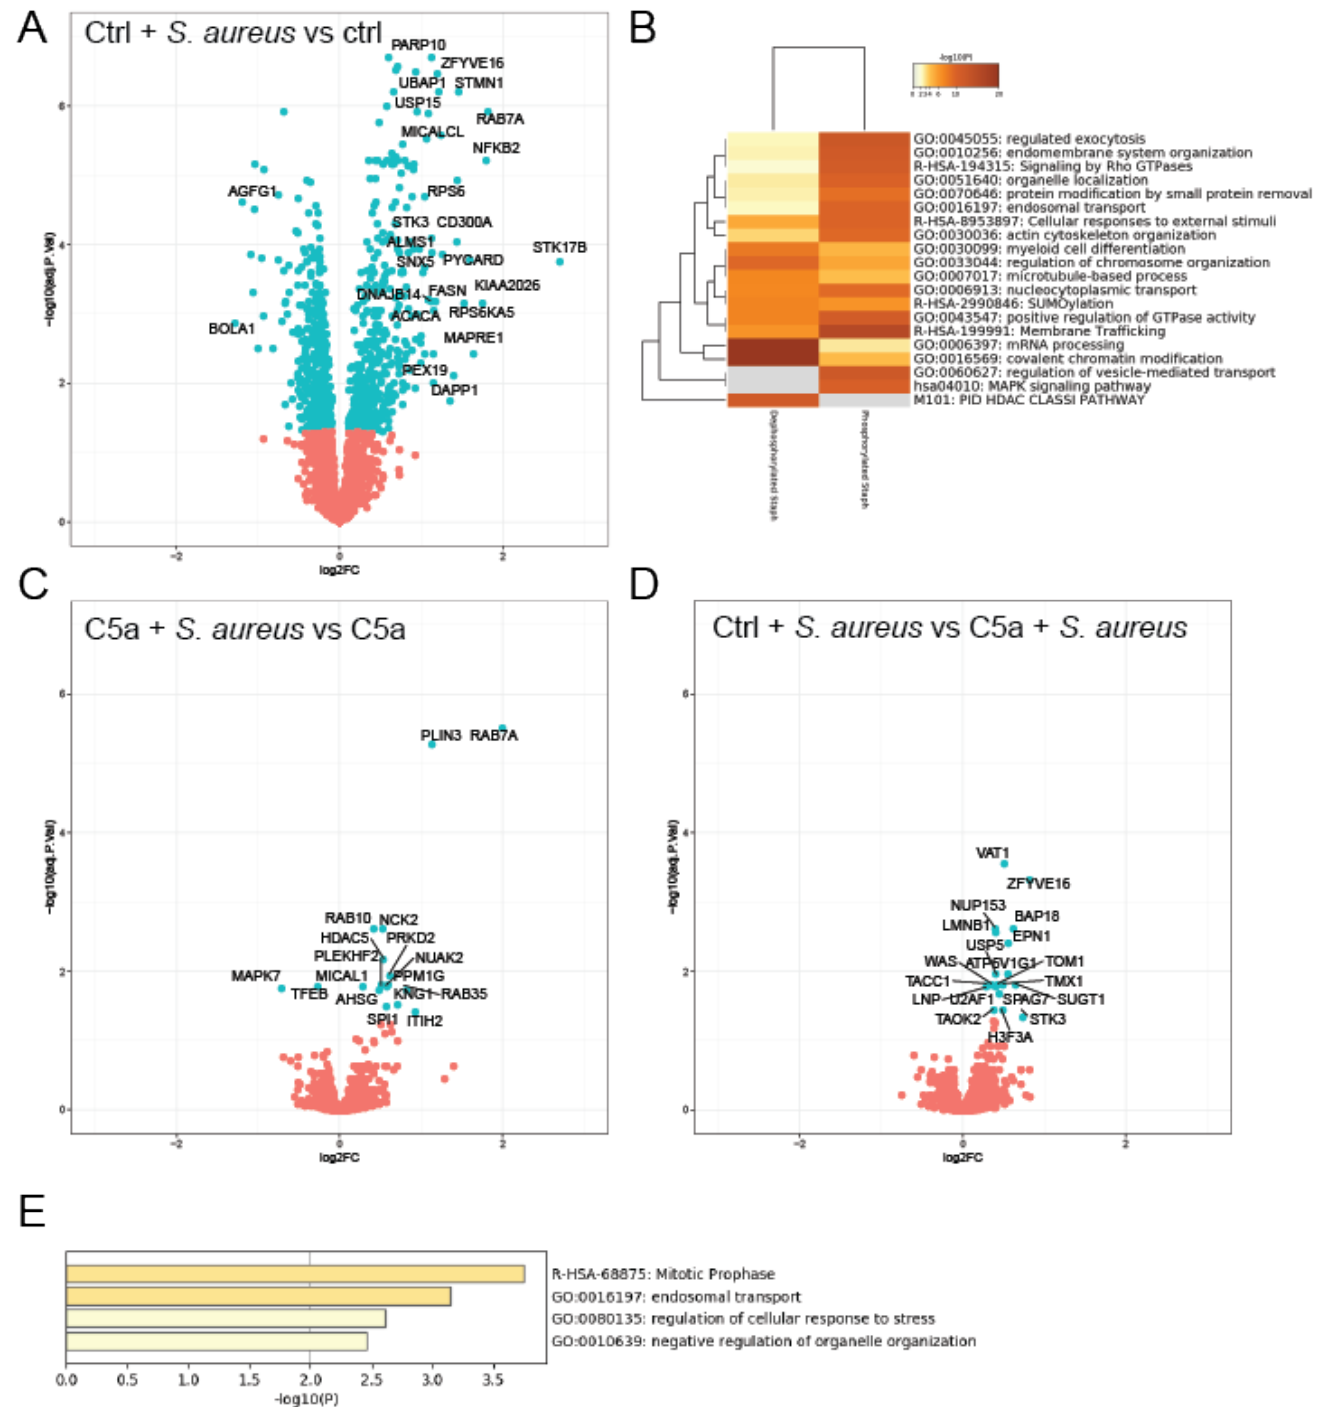

**Figure 5**

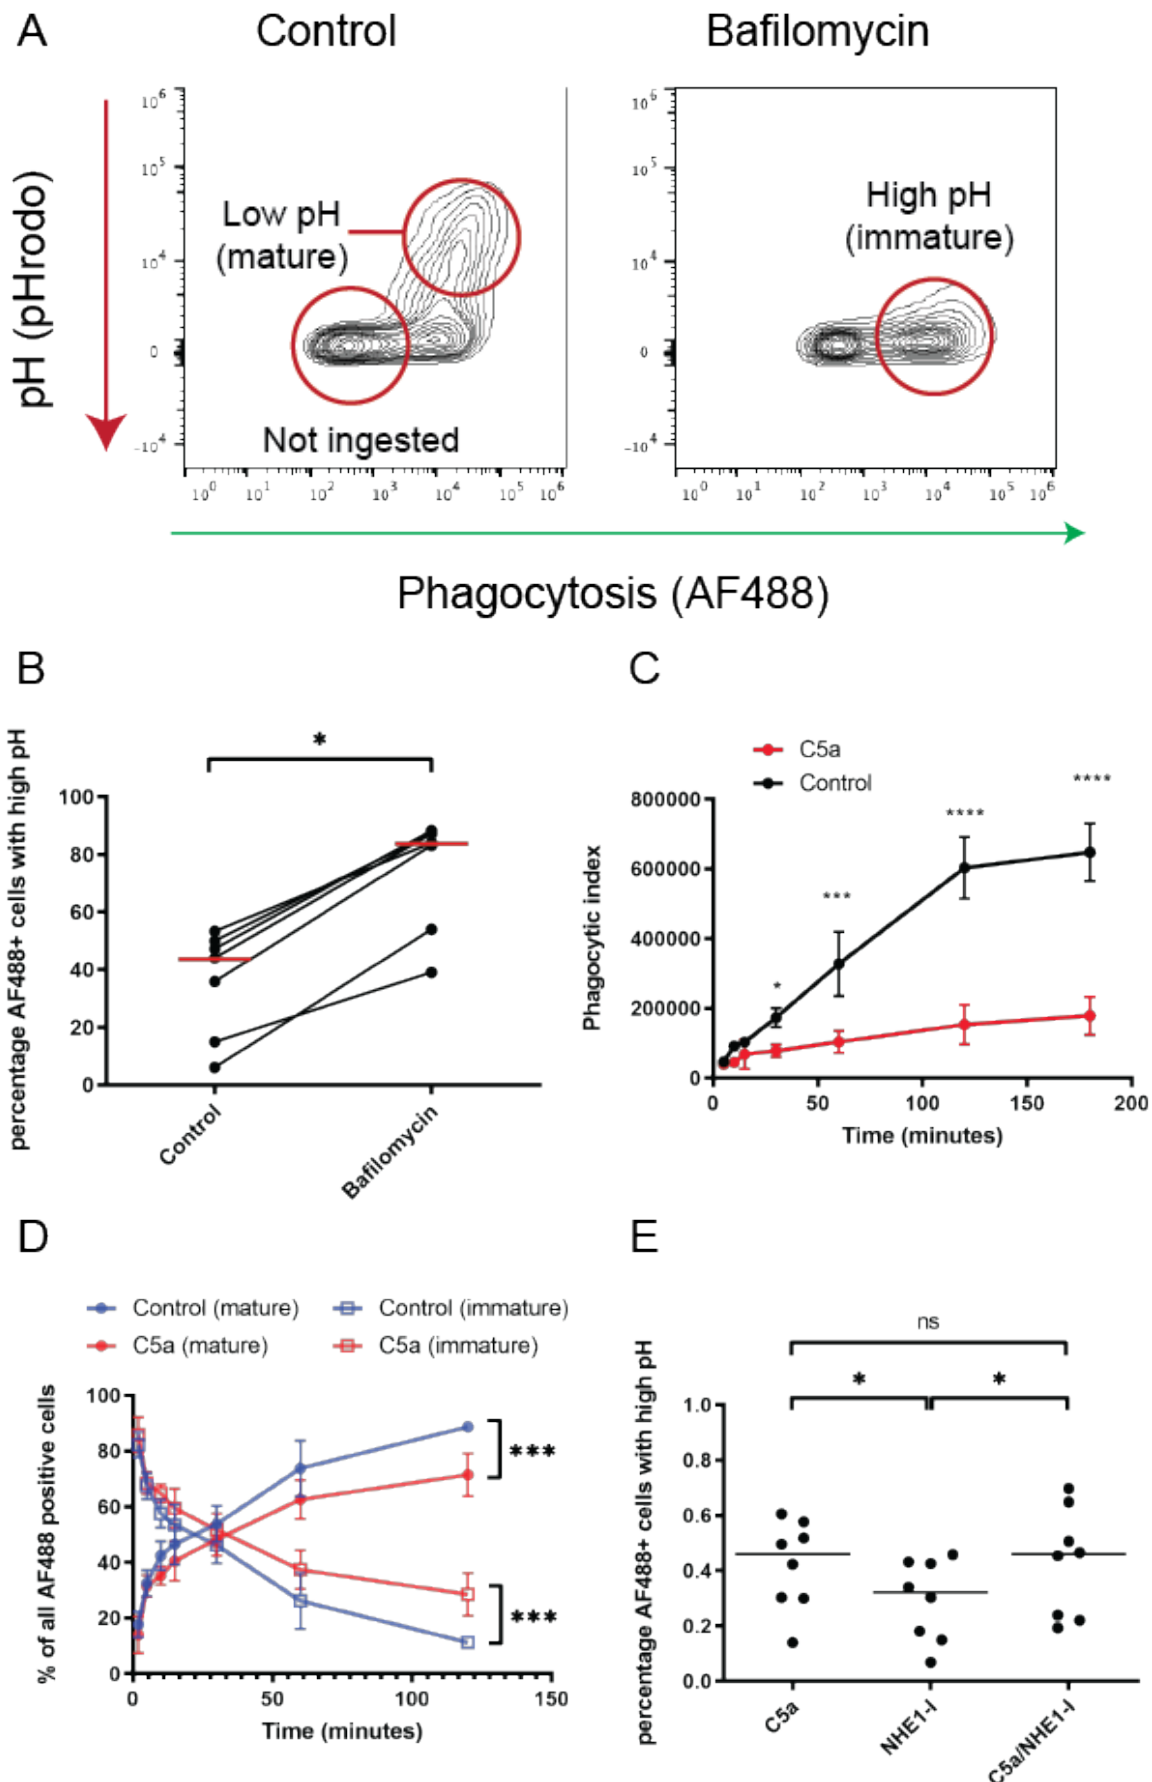

**Figure 6**

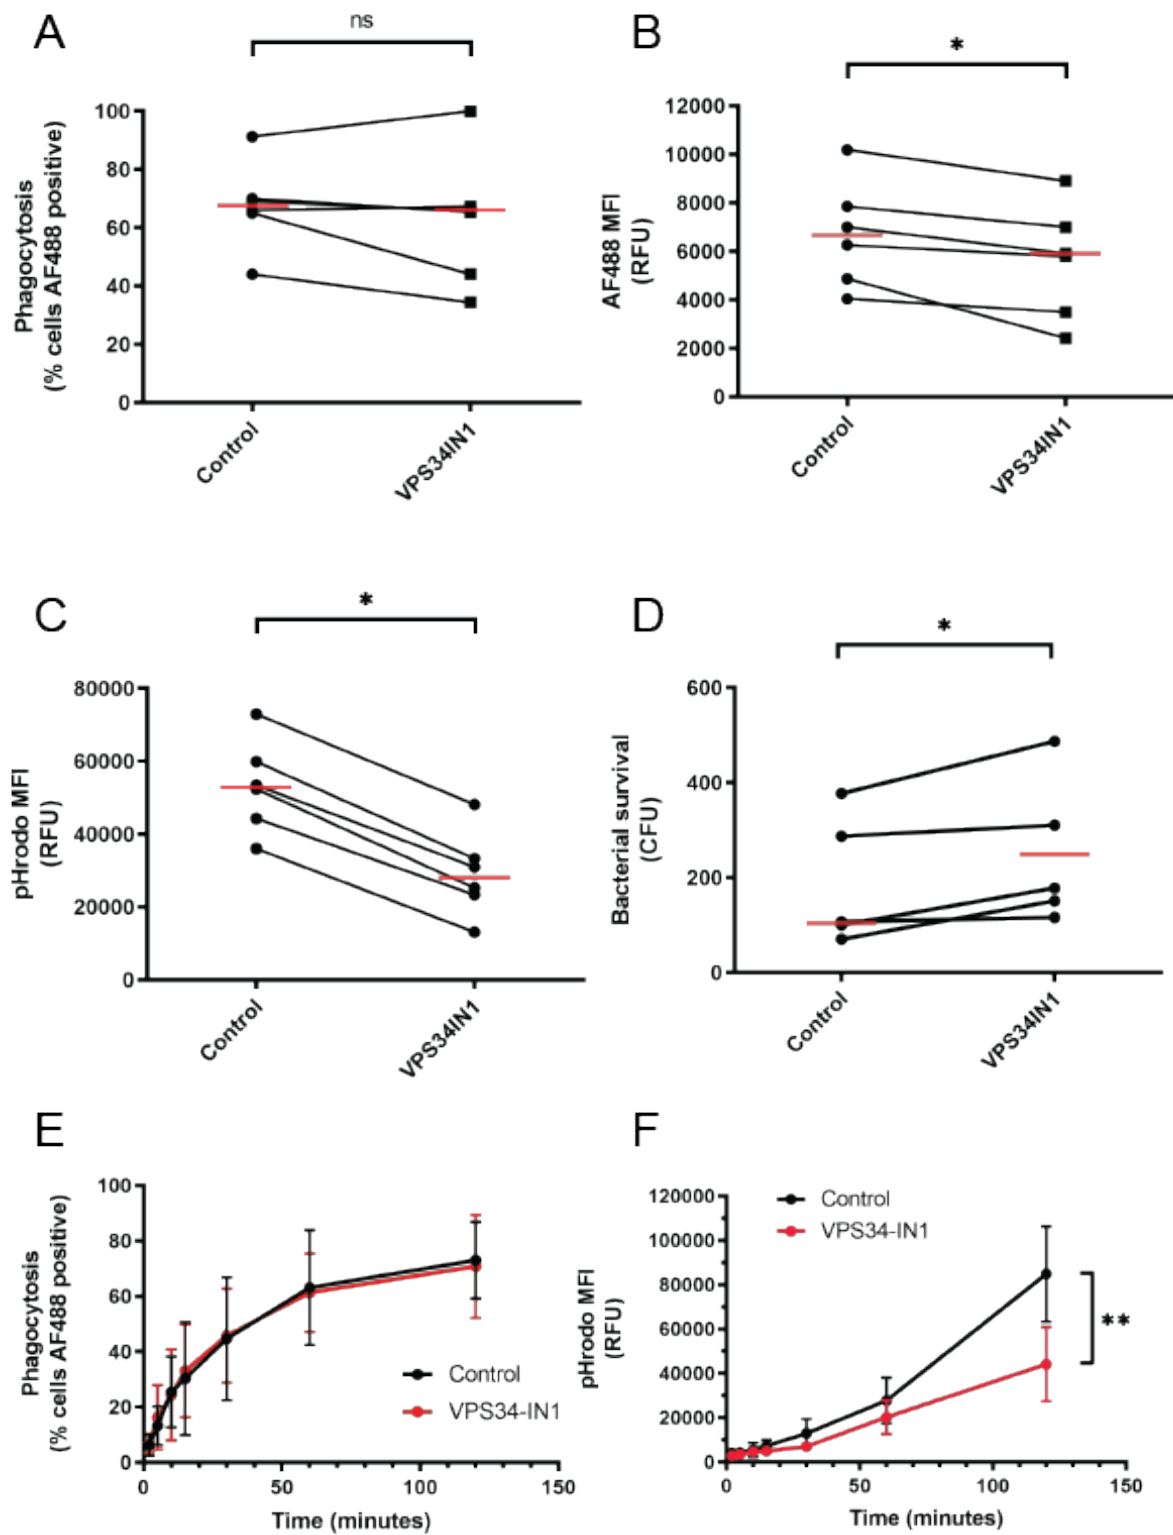

**Figure 7**

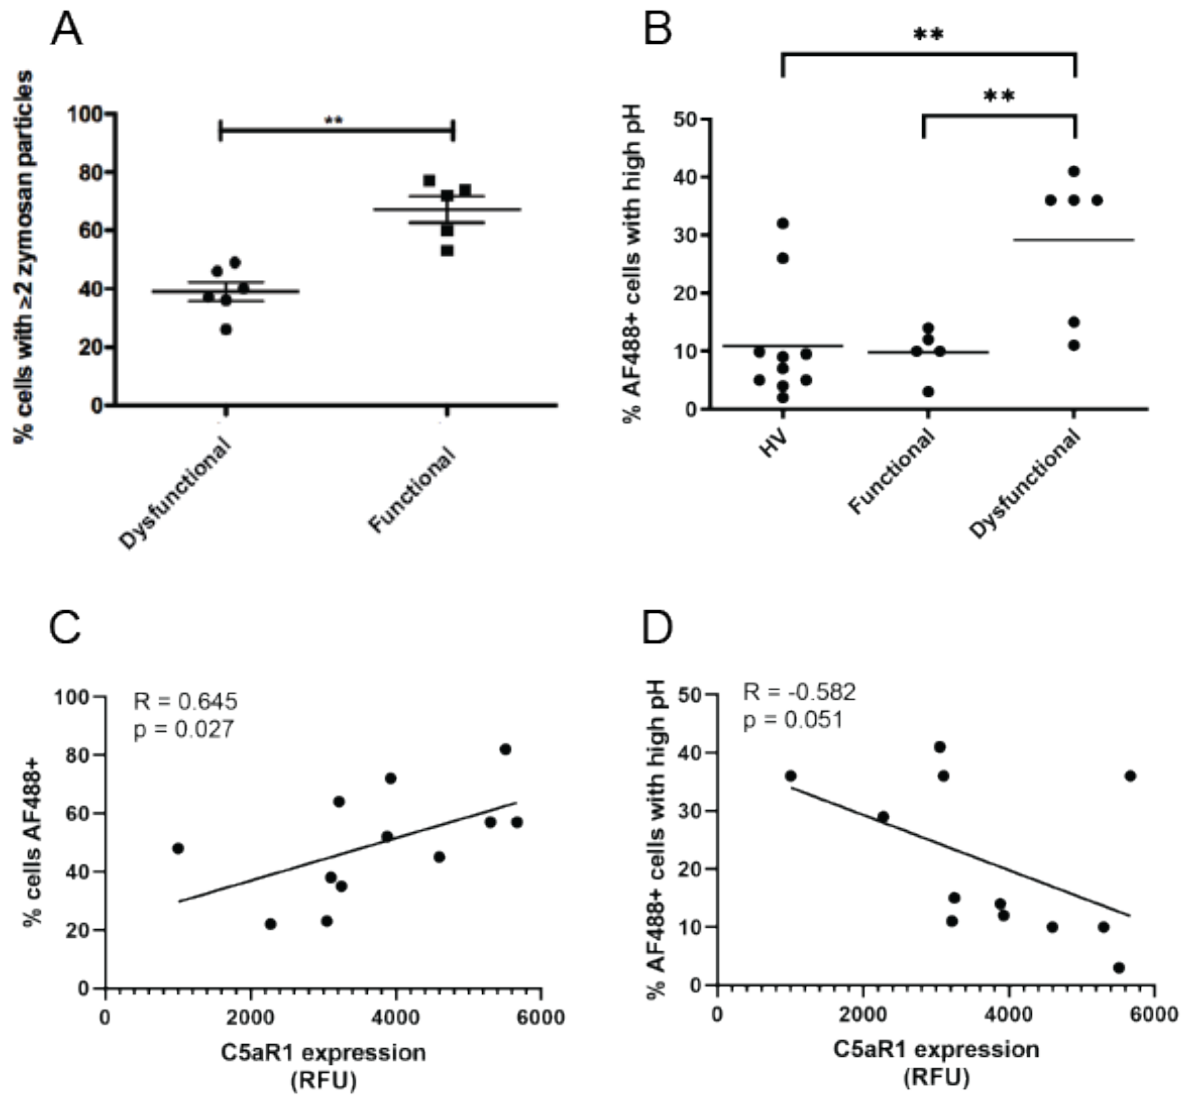

## Tables

**Table I: Differentially phosphorylated proteins between C5a and control-treated neutrophils exposed to *S. aureus*.**

All 19 phosphoproteins with Bonferroni adjusted p-values < 0.05 for difference in phosphorylation status between the Control plus *S. aureus* vs C5a plus *S. aureus* conditions. Subcellular location and function manually annotated from Uniprot database (The Uniprot Consortium, 2019).

| Protein name                                                 | Sub-cellular localisation                         | Functional role                                                                                      |
|--------------------------------------------------------------|---------------------------------------------------|------------------------------------------------------------------------------------------------------|
| <b>Endosomal/phagosomal</b>                                  |                                                   |                                                                                                      |
| Zinc finger FYVE domain-containing protein 16 (ZFYVE16)      | Early Endosomes                                   | PI(3)P binding FYVE domain, found on early endosomes, targets TOM1 to endosomes                      |
| Target of Myb protein 1 (TOM1)                               | Endosomes/azurophil granule membrane (neutrophil) | Known interactor with ZFYVE16                                                                        |
| V-type proton ATPase subunit G 1 (ATP6V1G1)                  | Endosomes/phagosomes                              | Proton channel acidifying vacuolar structures                                                        |
| Wiskott-Aldrich protein (WAS)                                | Cytoplasm, phagosomes                             | RhoGTPase effector and actin polymerisation                                                          |
| Epsin-1 (EPN1)                                               | Plasma membrane, clathrin coated pits             | Regulates receptor-mediated endocytosis, PI(4,5)P binding                                            |
| <b>Lysosomes</b>                                             |                                                   |                                                                                                      |
| Ubiquitin carboxyl-terminal hydrolase 5 (USP5)               | Lysosome and cytoplasm                            | Deubiquitination                                                                                     |
| Synaptic vesicle membrane protein VAT-1 homolog (VAT1)       | Lysosomes/azurophil granule (neutrophil)          | Neutrophil degranulation                                                                             |
| <b>Nuclear</b>                                               |                                                   |                                                                                                      |
| Nuclear pore complex protein 153 (NUP153)                    | Nuclear membrane                                  | Phosphorylation occurs during nuclear membrane disassembly                                           |
| Lamin-B1 (LMNB1)                                             | Nuclear membrane                                  | Phosphorylation occurs during nuclear membrane disassembly                                           |
| Histone H3.3 (H3F3A)                                         | Nucleus                                           | Histone protein                                                                                      |
| Protein SGT1 homolog (SUGT1)                                 | Nucleus and kinteochore                           | Mitosis                                                                                              |
| Sperm-associated antigen 7 (SPAG7)                           | Nucleus                                           | Nucleic acid binding                                                                                 |
| Splicing factor U2AF 35 kDa subunit (U2AF1)                  | Nucleus                                           | RNA splicing                                                                                         |
| Chromatin complexes subunit BAP18 (BAP18)                    | Nucleus                                           | Chromatin organisation                                                                               |
| <b>Nuclear/Cytoplasmic proteins</b>                          |                                                   |                                                                                                      |
| Serine/threonine-protein kinase 3 (STK3)                     | Nucleus/cytoplasm                                 | Cycles between nucleus and cytoplasm, influenced by phosphorylation status under control of caspases |
| Transforming acidic coiled-coil-containing protein 1 (TACC1) | Nucleus, centrosome, microtubules                 | Microtubule organisation and mitotic spindle formation                                               |
| Serine/threonine-protein kinase TAO2 (TAOK2)                 | Nucleus/Cytoskeleton                              | Regulation of actin cytoskeleton and MAP kinase activity                                             |
| <b>Endoplasmic reticulum</b>                                 |                                                   |                                                                                                      |
| Protein lunapark (LNP)                                       | Endoplasmic reticulum                             | Phosphorylated during mitosis                                                                        |

|                                                       |                       |                                   |
|-------------------------------------------------------|-----------------------|-----------------------------------|
| Thioredoxin-related<br>transmembrane protein 1 (TMX1) | Endoplasmic reticulum | Cell response to oxidative stress |
|-------------------------------------------------------|-----------------------|-----------------------------------|
